# Supplementary material for: Cancer stem cell assay-guided chemotherapy improves survival of patients with recurrent glioblastoma in a randomized trial
Source: PubMed Central journal article supplement (PMC10213810; doi:10.1016/j.xcrm.2023.101025), 2023-05-02
Supplement: mmc1.pdf [file mmc1.pdf]

**Cell Reports Medicine, Volume 4**

**Supplemental information**

**Cancer stem cell assay-guided chemotherapy  
improves survival of patients with recurrent  
glioblastoma in a randomized trial**

**Tulika Ranjan, Soma Sengupta, Michael J. Glantz, Richard M. Green, Alexander Yu, Dawit Aregawi, Rekha Chaudhary, Ricky Chen, Mario Zuccarello, Christine Lu-Emerson, Hugh D. Moulding, Neil Belman, Jon Glass, Aaron Mammoser, Mark Anderson, Jagan Valluri, Nicholas Marko, Jason Schroeder, Steven Jubelirer, Frances Chow, Pier Paolo Claudio, Anthony M. Alberico, Seth T. Lirette, Krista L. Denning, and Candace M. Howard**

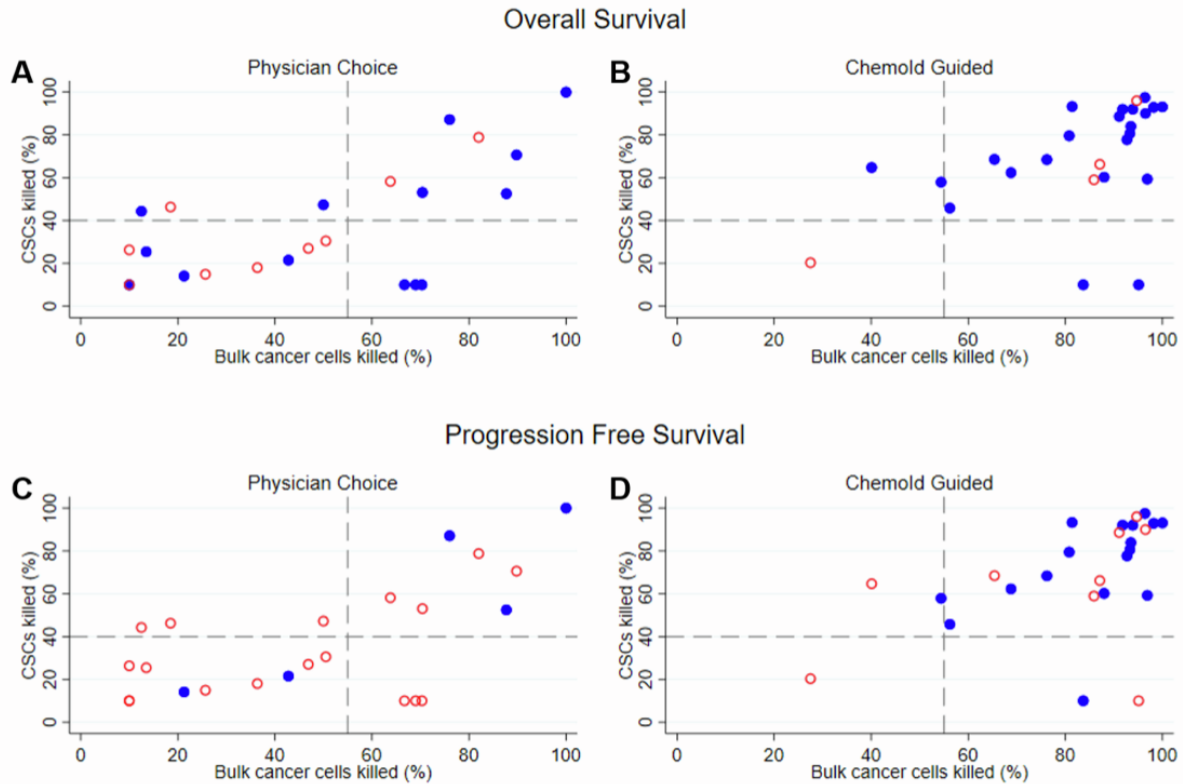

**Supplemental Figure 1. Patient’ OS and PFS correlated with the cell kill of drugs used during treatment as per the Chemold test report, related to figure 3**

**A)** Quadrant diagrams of the associative analysis of cell kill percentages (bulk tumor cell and CSCs) vs patient OS at 6-months post-randomization. Open-red circles, participants who had died; solid blue circles, participants surviving.

**B)** Quadrant diagrams of the associative analysis of cell kill percentages (bulk tumor cell and CSC) vs patient PFS at 6-months post-randomization. Open red circles, participants who had progressed; solid blue circles, participants who had not progressed.

Referent lines, 40% for CSCs and 55% for bulk tumor cells indicate the optimal thresholds from the logistic regression models.

**A**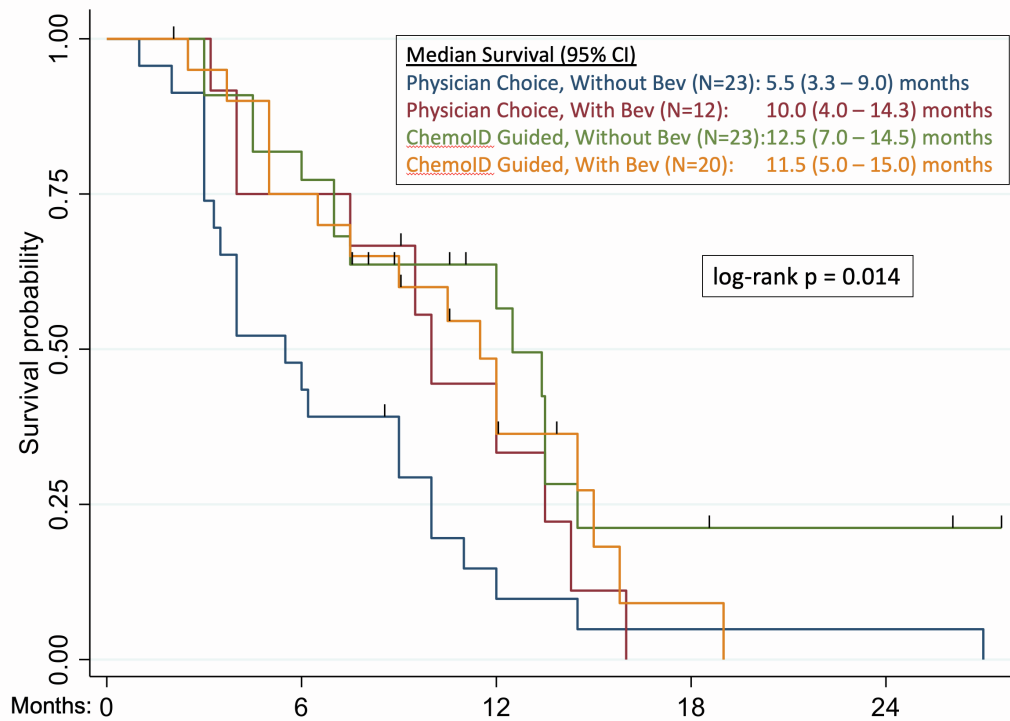**B**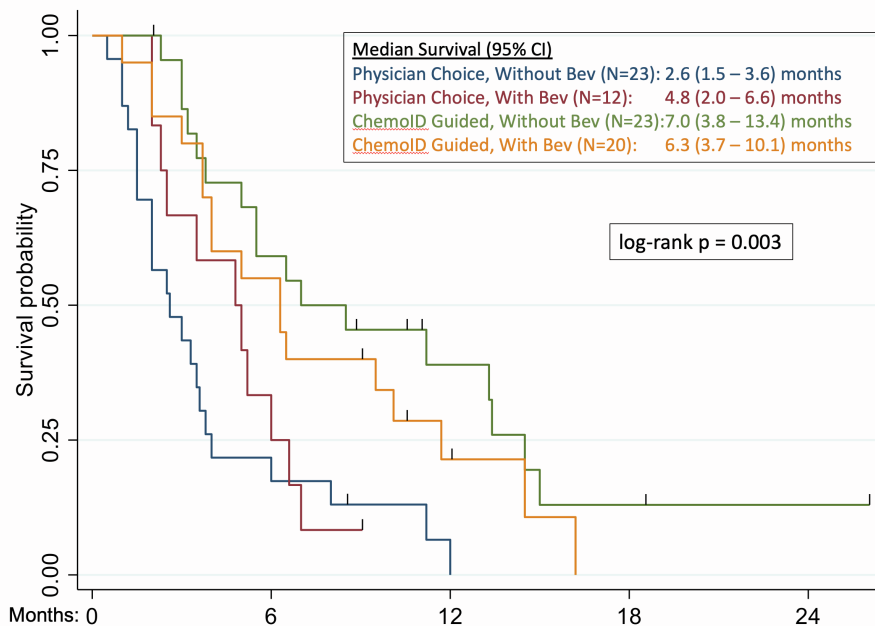

**Supplemental Figure 2. Kaplan Meier plots of OS and PFS stratified by the use of Bevacizumab during chemotherapy treatment, related to figure 3**

A) ITT Kaplan Meier analysis of OS

B) ITT Kaplan Meier analysis of Progression Free Survival (PFS)



### Physician Choice

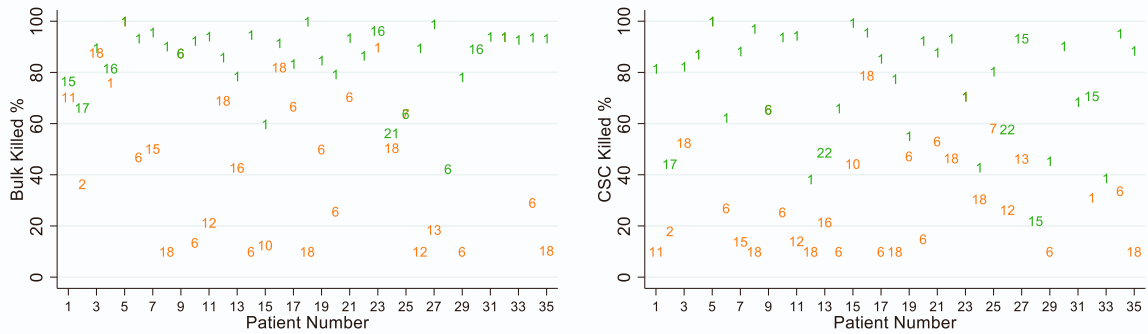

### ChemOID Guided

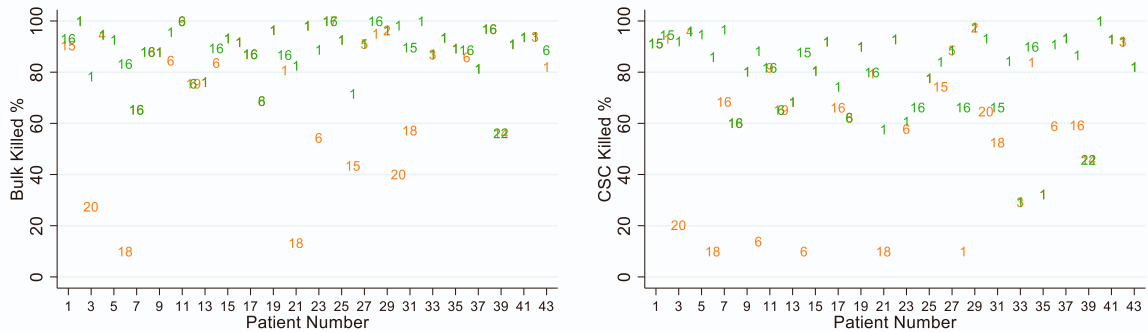

**Supplemental Figure 4. Cell-kill diagram for the panel of tested chemotherapy and their combinations across all subjects with patient numbers on the x-axis and drug observed cell-kill on the y-axis, related to figure 3**

Green numbers represent the ChemOID-identified best drug(s) and orange numbers are the drugs used for therapy. 1: BCNU; 2: BCNU, Carboplatin; 3: BCNU, Etoposide; 4: BCNU, Imatinib; 5: BCNU, Imatinib, Etoposide; 6: CCNU; 7: CCNU, Etoposide; 8: CCNU, Etoposide, TMZ, Imatinib; 9: CCNU, TMZ, Imatinib, Procarbazine, Etoposide; 10: Carboplatin, Irinotecan; 11: Carboplatin, TMZ, Irinotecan; 12: Etoposide; 13: Etoposide, Carboplatin; 14: Etoposide, Vincristine; 15: Imatinib; 16: Imatinib, TMZ; 17: Procarbazine, CCNU, Vincristine; 18: TMZ; 19: TMZ, CCNU; 20: TMZ, Carboplatin; 21: Irinotecan; 22: Vincristine.

A)

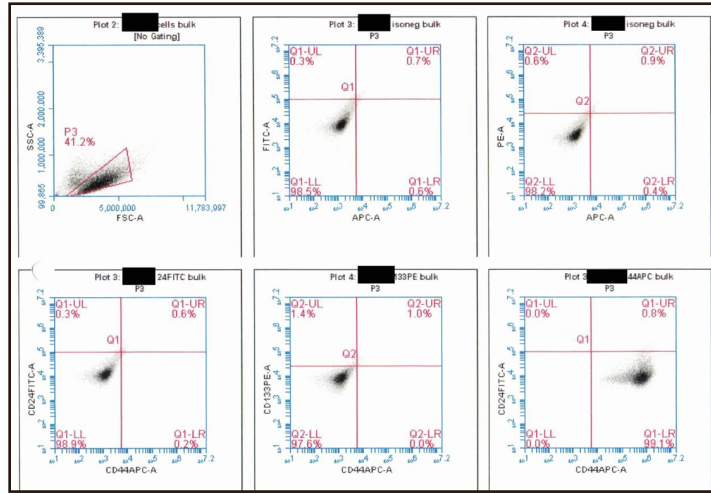

B)

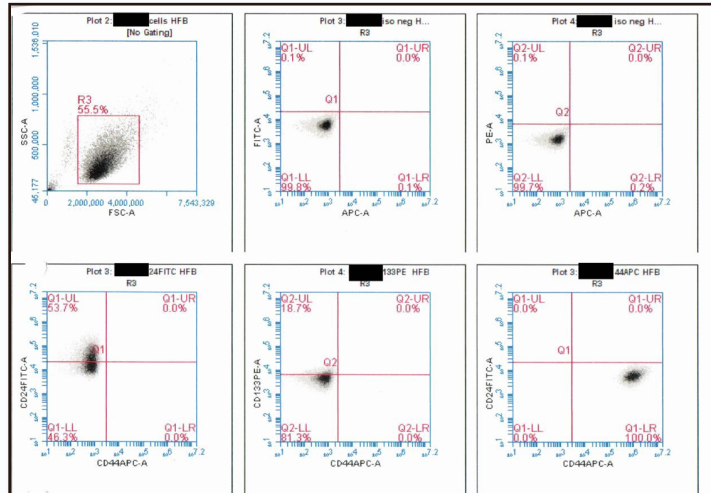

**Supplemental Figure 5. Example of flow cytometric analysis of CD133, CD44, and CD24 expression in a patient-derived primary GBM cell line (Bulk of Tumor - Baseline) and bioreactor-enriched CSCs, related to STAR methods**

- A) Bulk of the Tumor - baseline. CD133 1.4%; CD24 0.3%; CD44 99.1%
- B) Bioreactor-enriched CSCs. CD133 18.7%; CD24 53.7%; CD44 100%

**Supplemental Table 1. List of Chemotherapeutic Agents and Combinations with doses, related to STAR methods**

|          | <b>Single drugs</b>      | <b>Dose</b>                    |
|----------|--------------------------|--------------------------------|
| <b>1</b> | Carboplatin              | 350 mg/m <sup>2</sup> or 4 AUC |
| <b>2</b> | Irinotecan               | 125 mg/m <sup>2</sup>          |
| <b>3</b> | Etoposide                | 50 mg/m <sup>2</sup>           |
| <b>4</b> | BCNU                     | 100 mg/m <sup>2</sup>          |
| <b>5</b> | CCNU                     | 100 mg/m <sup>2</sup>          |
| <b>6</b> | Temozolomide             | 150-200 mg/m <sup>2</sup>      |
| <b>7</b> | Procarbazine             | 60 mg/m <sup>2</sup>           |
| <b>8</b> | Vincristine              | 1.4 mg/m <sup>2</sup>          |
| <b>9</b> | Imatinib                 | 400 mg                         |
|          | <b>Drug combinations</b> | <b>Dose</b>                    |
| <b>1</b> | Procarbazine             | 60 mg/m <sup>2</sup>           |
|          | CCNU                     | 100 mg/m <sup>2</sup>          |
|          | Vincristine              | 1.4 mg/m <sup>2</sup>          |
| <b>2</b> | Carboplatin              | 350 mg/m <sup>2</sup> or 4 AUC |
|          | Irinotecan               | 125 mg/m <sup>2</sup>          |
| <b>3</b> | Carboplatin              | 350 mg/m <sup>2</sup> or 4 AUC |
|          | Etoposide                | 50 mg/m <sup>2</sup>           |
| <b>4</b> | Temozolomide             | 50 mg/m <sup>2</sup>           |
|          | Etoposide                | 50 mg/m <sup>2</sup>           |
| <b>5</b> | Temozolomide             | 50 mg/m <sup>2</sup>           |
|          | Imatinib                 | 200 mg                         |

**Supplemental Table 2. The accordance between the ChemOID assay prediction and treatment administered, related to figure 3**

|                                                         | <b>Physician-choice group</b> | <b>ChemOID-guided group</b> |
|---------------------------------------------------------|-------------------------------|-----------------------------|
| <b>Accordance of assay prediction with regimen used</b> |                               |                             |
| <b>No</b>                                               | 64.5%                         | 19.5%                       |
| <b>Yes</b>                                              | 35.5%                         | 80.5%                       |



**Supplemental Table 3. Treatment-related AE observed, related to figure 3**

| Adverse events                                                              | Physician-choice group |                |                  | ChemolD-guided group |                |                  |
|-----------------------------------------------------------------------------|------------------------|----------------|------------------|----------------------|----------------|------------------|
|                                                                             | AE grades 1-4*         | AE grades 1-2* | AE grades 3 & 4* | AE grades 1-4*       | AE grades 1-2* | AE grades 3 & 4* |
| <b>All, No.</b>                                                             | 92                     | 50             | 42               | 87                   | 44             | 43               |
| <b>Chemotherapy - related, No. (%)</b>                                      | 54/92<br>(59%)         | 25/50<br>(50%) | 33/42<br>(79%)   | 46/87<br>(53%)       | 19/44<br>(43%) | 22/43<br>(51%)   |
| * Grades: 1, mild; 2, moderate; 3, severe; 4, life threatening (CTCAE v5.0) |                        |                |                  |                      |                |                  |

**Supplemental Table 4. Inclusion and exclusion criteria, related to figures 1 and 2**

|                                                                                                                                                                                                                                                                                         |
|-----------------------------------------------------------------------------------------------------------------------------------------------------------------------------------------------------------------------------------------------------------------------------------------|
| <b>Inclusion criteria</b>                                                                                                                                                                                                                                                               |
| Men and Women and members of all ethnic groups who are at least 18 years old at the time of enrollment are eligible for this trial;                                                                                                                                                     |
| Informed consent obtained and signed;                                                                                                                                                                                                                                                   |
| Willing and able to commit to study procedures including long-term follow-up visit(s) on or off the study protocol;                                                                                                                                                                     |
| Histopathologically confirmed 2016-WHO grade III recurrent glioma, and grade IV recurrent glioblastoma (GBM), inclusive of Gliosarcoma;                                                                                                                                                 |
| In all cases, the diagnosis must be confirmed by a pathologist.                                                                                                                                                                                                                         |
| Recurrent surgically resectable tumor and or biopsy;                                                                                                                                                                                                                                    |
| Participants who have undergone surgical resection should have received an MRI or a scan after surgery in order to visualize residual tumor. If not, the operative report must be available;                                                                                            |
| Prior to surgery there was imaging evidence of measurable progressive disease (PD);                                                                                                                                                                                                     |
| Re-radiation, if indicated, should occur at least 2 weeks after surgery and/or biopsy, once the wound has healed well without any drainage or cellulitis;                                                                                                                               |
| Estimated survival of at least 3 months;                                                                                                                                                                                                                                                |
| Hgb > 9 gm; absolute neutrophil count (ANC) > 1500/ $\mu$ l; platelets > 100,000; creatinine < 1.5 times the upper limit of laboratory normal value; bilirubin < 2 times the upper limit of laboratory normal value; SGPT or SGOT < 3 times the upper limit of laboratory normal value; |
| Chemotherapy must start within 8 weeks of tumor resection or biopsy;                                                                                                                                                                                                                    |
| Bevacizumab (Avastin) is allowed. If indicated, it should be initiated at least 4 weeks post craniotomy or biopsy if the wound has healed well without any drainage or cellulitis;                                                                                                      |
| The use of herbal preparation or tetrahydrocannabinol/cannabidiol is strongly discouraged, but not contraindicated;                                                                                                                                                                     |
| <b>Exclusion criteria</b>                                                                                                                                                                                                                                                               |
| Subjects with newly diagnosed GBM                                                                                                                                                                                                                                                       |
| Pregnant women or nursing mothers. Women of childbearing age must have a negative pregnancy test prior to study entry. Women of childbearing potential must practice medically approved contraceptive precautions;                                                                      |
| Abnormal hematological results at inclusion with neutrophils < 1,500/mm <sup>3</sup> and/or blood-platelets < 100,000/mm <sup>3</sup>                                                                                                                                                   |
| Severe or chronic renal insufficiency (creatinine clearance $\leq$ 30 ml/min                                                                                                                                                                                                            |
| Unable to adhere to required procedures, visits, examinations described in the study;                                                                                                                                                                                                   |
| Any usual formal indication against imaging examinations (important claustrophobia, pacemaker);                                                                                                                                                                                         |
| History of another malignancy in the previous 2 years, with a disease-free interval <2 years. Patients with prior history of in situ cancer or basal or squamous cell skin cancer, any time prior to screening, are eligible.                                                           |
| OPTUNE device is not permitted in the study;                                                                                                                                                                                                                                            |
| Participation in clinical trials utilizing a liquid biomarker or imaging studies that impact overall survival.                                                                                                                                                                          |
| Abbreviations: ANC, absolute neutrophil count; GBM, glioblastoma; PD, progressive disease; SGOT, serum glutamate oxaloacetate transaminase; SGPT, serum glutamate pyruvate transaminase.                                                                                                |

**Supplemental Table 5. Examples of Limiting Dilution Tumorigenic Assays of patient-derived GBM of bioreactor-enriched CSCs, related to STAR methods**

Immune-deficient mice were injected into the flank in the presence of matrigel with various doses of GBM bioreactor-enriched CSCs and tumor growth was followed for up to 14 weeks.

| Primary cell line | N° of CSCs Inoculated | N° Tumors formed | Tumor Palpation weeks) |
|-------------------|-----------------------|------------------|------------------------|
| BNC-1             | 1x10 <sup>5</sup>     | 5/5              | 5                      |
|                   | 1x10 <sup>4</sup>     | 5/5              | 8                      |
|                   | 1x10 <sup>3</sup>     | 5/5              | 8-10                   |
|                   | 1x10 <sup>2</sup>     | 4/5              | 8-12                   |
|                   | 1x10 <sup>1</sup>     | 0/5              | 12-14                  |
| BNC-2             | 1x10 <sup>5</sup>     | 5/5              | 5                      |
|                   | 1x10 <sup>4</sup>     | 5/5              | 8                      |
|                   | 1x10 <sup>3</sup>     | 4/5              | 8-10                   |
|                   | 1x10 <sup>2</sup>     | 3/5              | 8-12                   |
|                   | 1x10 <sup>1</sup>     | 0/5              | 12-14                  |
| BNC-3             | 1x10 <sup>5</sup>     | 5/5              | 5                      |
|                   | 1x10 <sup>4</sup>     | 4/5              | 8                      |
|                   | 1x10 <sup>3</sup>     | 4/5              | 8-10                   |
|                   | 1x10 <sup>2</sup>     | 4/5              | 8-12                   |
|                   | 1x10 <sup>1</sup>     | 0/5              | 12-14                  |
| BNC-4             | 1x10 <sup>5</sup>     | 5/5              | 5                      |
|                   | 1x10 <sup>4</sup>     | 5/5              | 8                      |
|                   | 1x10 <sup>3</sup>     | 5/5              | 8-10                   |
|                   | 1x10 <sup>2</sup>     | 4/5              | 8-12                   |
|                   | 1x10 <sup>1</sup>     | 0/5              | 12-14                  |
| BNC-5             | 1x10 <sup>5</sup>     | 5/5              | 5                      |
|                   | 1x10 <sup>4</sup>     | 5/5              | 8                      |
|                   | 1x10 <sup>3</sup>     | 5/5              | 8-10                   |
|                   | 1x10 <sup>2</sup>     | 3/5              | 8-12                   |
|                   | 1x10 <sup>1</sup>     | 0/5              | 12-14                  |
