# Supplementary material for: Cancer stem cell assay-guided chemotherapy improves survival of patients with recurrent glioblastoma in a randomized trial
Source: PubMed Central journal article supplement (PMC10213810; doi:10.1016/j.xcrm.2023.101025), 2023-05-02
Supplement: mmc2.pdf [file mmc2.pdf]

# Cancer stem cell assay-guided chemotherapy improves survival of patients with recurrent glioblastoma in a randomized trial

## Graphical abstract

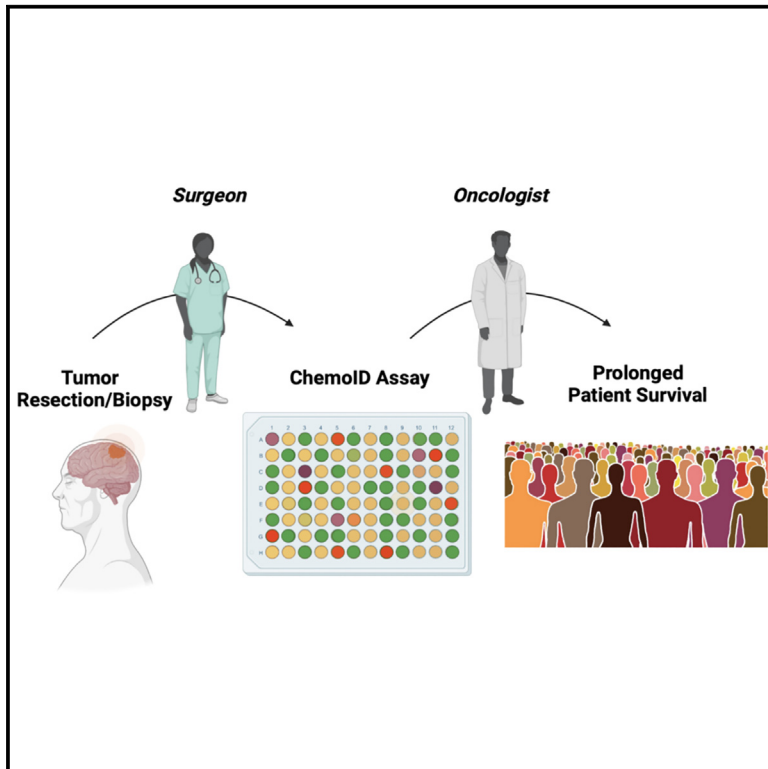

## Authors

Tulika Ranjan, Soma Sengupta, Michael J. Glantz, ..., Seth T. Lirette, Krista L. Denning, Candace M. Howard

## Correspondence

cmhoward@umc.edu

## In brief

Ranjan et al. use a cancer stem cell assay to guide treatment for recurrent GBM. Targeting cancer stem cells and bulk of tumor cells from patient biopsies to predict the clinical response improves survival outcomes. Results of this clinical trial represent the value of functional diagnostics in precision oncology.

## Highlights

- Cancer stem cell assay (ChemolD) can accurately predict clinical response to treatment
- ChemolD assay is evaluated in a randomized clinical trial for recurrent glioblastoma
- FDA-approved chemotherapies for recurrent glioblastoma are utilized in the trial
- ChemolD assay-guided therapy improves the median OS and PFS of patients with recurrent GBM

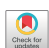

## Article

# Cancer stem cell assay-guided chemotherapy improves survival of patients with recurrent glioblastoma in a randomized trial

Tulika Ranjan,<sup>1,2,25</sup> Soma Sengupta,<sup>3,25</sup> Michael J. Glantz,<sup>4</sup> Richard M. Green,<sup>5</sup> Alexander Yu,<sup>6</sup> Dawit Aregawi,<sup>4</sup> Rekha Chaudhary,<sup>7</sup> Ricky Chen,<sup>8</sup> Mario Zuccarello,<sup>9</sup> Christine Lu-Emerson,<sup>10</sup> Hugh D. Moulding,<sup>11</sup> Neil Belman,<sup>11</sup> Jon Glass,<sup>12</sup> Aaron Mammoser,<sup>13</sup> Mark Anderson,<sup>14</sup> Jagan Valluri,<sup>15</sup> Nicholas Marko,<sup>17</sup> Jason Schroeder,<sup>18</sup> Steven Jubelirer,<sup>19</sup> Frances Chow,<sup>20</sup> Pier Paolo Claudio,<sup>15,16,26</sup> Anthony M. Alberico,<sup>21</sup> Seth T. Lirette,<sup>22</sup> Krista L. Denning,<sup>23</sup> and Candace M. Howard<sup>24,\*</sup>

<sup>1</sup>Department of Neuro-Oncology, Allegheny Health Network, Pittsburgh, PA, USA

<sup>2</sup>Department of Neuro-Oncology, Cancer Center Southern Florida, Tampa General Hospital, Tampa, FL, USA

<sup>3</sup>Department of Neurology and Rehabilitation Medicine, University of Cincinnati, Cincinnati, OH, USA

<sup>4</sup>Department of Neurosurgery, Penn State Neuroscience Institute, Hershey, PA, USA

<sup>5</sup>Department of Neuro-Oncology, Southern California Permanente Medical Group, Los Angeles, CA, USA

<sup>6</sup>Department of Neurosurgery, Allegheny Health Network, Pittsburgh, PA, USA

<sup>7</sup>Department of Internal Medicine, Division of Hematology-Oncology, University of Cincinnati, Cincinnati, OH, USA

<sup>8</sup>Department of Neuro-Oncology, Providence Brain & Spine Institute, Portland, OR, USA

<sup>9</sup>Department of Neurosurgery, University of Cincinnati, Cincinnati, OH, USA

<sup>10</sup>Department of Neuro-Oncology, Maine Medical Center, Scarborough, ME, USA

<sup>11</sup>Department of Neuroscience, St. Luke's University Hospital & Health Network, Bethlehem, PA, USA

<sup>12</sup>Departments of Neurology and Neurological Surgery, Thomas Jefferson University, Philadelphia, PA, USA

<sup>13</sup>Department of Neurosurgery, LSU Health Sciences Center, New Orleans, LA, USA

<sup>14</sup>Department of Neurology, University of Mississippi Medical Center, Jackson, MS, USA

<sup>15</sup>Cordgenics, LLC, Huntington WV, USA

<sup>16</sup>Department of Pharmacology & Toxicology, University of Mississippi Medical Center, Jackson, MS, USA

<sup>17</sup>Department of Neurosurgery, LewisGale Regional Health System, Salem, VA, USA

<sup>18</sup>Department of Neurosurgery, University of Toledo, Toledo, OH, USA

<sup>19</sup>Department of Neuro-Oncology, Charleston Area Medical Center, Charleston, WV, USA

<sup>20</sup>Departments of Neurological Surgery and Neurology, University of Southern California, Los Angeles, CA, USA

<sup>21</sup>Department of Neurosurgery, Joan C. Edwards School of Medicine, Marshall University, Huntington, WV, USA

<sup>22</sup>Department of Data Science, University of Mississippi Medical Center, Jackson, MS, USA

<sup>23</sup>Department of Pathology, Joan C. Edwards School of Medicine, Marshall University, Huntington, WV, USA

<sup>24</sup>Department of Radiology, University of Mississippi Medical Center, Jackson, MS, USA

<sup>25</sup>These authors contributed equally

<sup>26</sup>Lead contact

\*Correspondence: [cmhoward@umc.edu](mailto:cmhoward@umc.edu)

<https://doi.org/10.1016/j.xcrm.2023.101025>

## SUMMARY

Therapy-resistant cancer stem cells (CSCs) contribute to the poor clinical outcomes of patients with recurrent glioblastoma (rGBM) who fail standard of care (SOC) therapy. ChemolD is a clinically validated assay for identifying CSC-targeted cytotoxic therapies in solid tumors.

In a randomized clinical trial (NCT03632135), the ChemolD assay, a personalized approach for selecting the most effective treatment from FDA-approved chemotherapies, improves the survival of patients with rGBM (2016 WHO classification) over physician-chosen chemotherapy. In the ChemolD assay-guided group, median survival is 12.5 months (95% confidence interval [CI], 10.2–14.7) compared with 9 months (95% CI, 4.2–13.8) in the physician-choice group ( $p = 0.010$ ) as per interim efficacy analysis. The ChemolD assay-guided group has a significantly lower risk of death (hazard ratio [HR] = 0.44; 95% CI, 0.24–0.81;  $p = 0.008$ ). Results of this study offer a promising way to provide more affordable treatment for patients with rGBM in lower socioeconomic groups in the US and around the world.

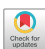

## INTRODUCTION

The standard of care (SOC) for glioblastoma (GBM) is a combination of surgery, radiotherapy, and concomitant temozolomide followed by maintenance temozolomide (TMZ) as demonstrated by the EORTC-NCIC trial.<sup>1,2</sup> Treatment of recurrent GBM (rGBM) is most commonly single or combination chemotherapy with nitrosoureas, TMZ, CPT-11, or bevacizumab (BV).<sup>1–3</sup> Unfortunately, current treatment options have proven to be largely ineffective, with some drugs having little to no survival benefit.<sup>4–8</sup> Patients have a poor prognosis as GBM generally recurs with a 5-year survival rate of less than 10%.<sup>1,2,7–9</sup> There is a significant unmet need for new strategies to personalize therapeutic options for the treatment of rGBM.

Due to the unpredictable nature of cancer, responses to chemotherapy can vary from patient to patient, even when cancer cells are of the same histology. Several genome-based methodologies and immunotherapies are under clinical investigation. They have not demonstrated a survival advantage in GBM,<sup>10</sup> and genome-directed drugs are often only applicable to a subset of patients with cancer with unique biomarkers.<sup>11,12</sup> Many patients with cancer in the US in lower socioeconomic groups struggle to pay for their treatments because of rising costs for novel treatments and rising premiums, deductibles, and copayments for private health insurance plans.<sup>13</sup> Additionally, most people, particularly in underserved areas, including those in developed nations with socialized healthcare systems or underdeveloped nations, lack access to many of the more recent targeted therapies and immunotherapies.<sup>14</sup> Also, immunotherapies, as yet, have not shown a survival advantage in GBM.<sup>10</sup> For these reasons, developing and optimizing cost-effective cytotoxic chemotherapies remain important.

A strategy to increase the survival of patients with GBM is to target the cancer stem cells (CSCs) that contribute to therapy resistance and cancer progression<sup>11,12</sup> by utilizing first- and second-line cytotoxic chemotherapies routinely covered by Medicare and health insurance plans. While there are newer targeted therapies and immunotherapies available today, this trial focused on screening SOC chemotherapies that are routinely covered and available to community oncology patients and for patients from other countries, where the more novel agents are not readily available.

The “CSC concept” was proposed four decades ago and revised recently and posits that tumor growth is analogous to the renewal of healthy tissues and fueled by small numbers of dedicated stem cells capable of plasticity.<sup>11,15–17</sup> The unidirectional and irreversible hierarchical progression of GBM growth has been studied in an animal model of GBM.<sup>18</sup> The ablation of CSCs in this model halted tumor growth and prolonged survival without apparent regeneration of the CSC pool from other GBM cells.<sup>18</sup> Many of the current therapeutic strategies (chemotherapy and radiation) aimed at eliminating rapidly dividing cancer cells (bulk tumor) involve treatment with standard anti-proliferative chemotherapy, with limited response. This poses a challenge, as the residual population of chemotherapy-resistant tumor cells capable of regenerating the disease (relapse) is enriched in CSCs.<sup>11,19</sup> In recent years, genetic fate mapping in several types of solid tumors has supported the notion that

recurrence after chemotherapy results from the persistence of CSCs. Slow-proliferating CSCs of GBM resist TMZ treatment in animal models. Genetic ablation of this cell population renders GBMs susceptible again to chemotherapy.<sup>18</sup> These data suggest that differentiated cells may subsequently replace lost stem cells through plasticity inferring that the CSCs, by representing a source of chemotherapy-resistant cells, contribute to the occurrence of relapse after treatment.<sup>15,19</sup>

For patients with rGBM, a viable treatment option is to select chemotherapies that will eliminate the CSCs, the main cause of treatment resistance, while reducing the bulk of tumor cells.<sup>19</sup> Real-world clinical studies demonstrated improved survival of patients with rGBM after treatment with CSC assay-guided chemotherapy regimens (ChemolD).<sup>20,21</sup>

Based on this proof of concept and on real-world data, a multi-institutional, randomized clinical trial (ClinicalTrials.gov: NCT03632135) of patients with rGBM was initiated to assess the efficacy of chemotherapy regimens selected by the ChemolD assay vs. best physician choice. The primary efficacy endpoint of this trial was demonstrated at a prespecified interim efficacy analysis.

## RESULTS

Over a period of 3 years, 123 patients affected by rGBM or grade III glioma were screened and assessed for eligibility criteria to participate in a parallel-group-randomized controlled trial at 13 clinical sites across the US. The study protocol was approved by the Western Institutional Review Board (WIRB) and the independent ethics committee of each of the participating institutions. 78 patients with rGBM (diagnosed according to the 2016 WHO classification of brain tumors) were enrolled in the study (consort diagram: [Figure 1](#)) after signing the informed consent. All enrolled subjects underwent surgical resection and biopsy. For histopathology confirmation and diagnosis, MGMT gene methylation, and IDH-1/-2 status, the tumor biopsies were sent to the sites' hospital pathology laboratory. A portion of each of the biopsies was sent from the operating room as a fresh tumor sample to the ChemolD central clinical pathology laboratory, where the assay was conducted. The ChemolD assay is a diagnostic test that determines the cytotoxic profile of CSCs and the bulk of tumor cells treated with various NCCN-approved chemotherapies and/or their combination. All registered patients in the trial underwent the ChemolD assay and were randomly assigned by the sites' coordinators to a study group using a computer-generated algorithm (in REDCap). Subjects were treated either with SOC chemotherapy chosen by the physician or treatment directed by the ChemolD assay ([Figure 2](#)). The treatment regimens in the two groups were chosen from the same list of chemotherapies ([Table S1](#)), depending on the randomly allocated study group (assay guided or physician best choice).

A predetermined interim survival efficacy analysis was conducted when 35 deaths were reported (August 20, 2021). Patient enrollment was stopped after the interim efficacy analysis because the study's primary endpoint (overall survival [OS]) was met during the planned interim efficacy analysis. Intention-to-treat (ITT) analysis was conducted on all 78 randomized subjects.

CONSORT DIAGRAM

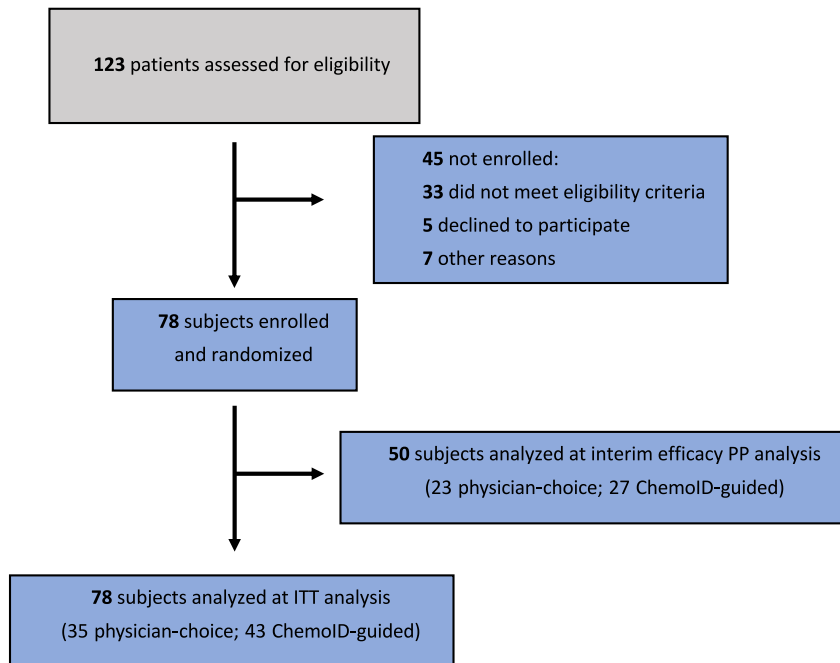

**Figure 1. CONSORT diagram of ChemolD study**

A total of 123 patients were screened between May 18, 2018, and May 30, 2021; 78 of these patients were randomized to either the ChemolD or physician-choice group. After 35 deaths were reported, the first prespecified interim efficacy analysis was performed.

0.143), and 0.57 vs. 0.25 at 12 months (OR, 4; 95% CI, 1.06–15.1;  $p = 0.041$ ) (Table 2).

The median progression-free survival (mPFS) was 10.1 months (95% CI, 4.8–15.4) for patients receiving ChemolD assay-guided therapy vs. 3.5 months (95% CI, 1.9–5.1) for physician-choice therapy (HR, 0.25; 95% CI, 0.14–0.44;  $p < 0.001$ ) (Figure 3B). The probability of PFS was greater in the ChemolD assay-guided group vs. the physician-choice group: 0.65 vs. 0.22 at 6 months (OR, 6.80; 95% CI, 1.89–24.4;  $p = 0.003$ ); 0.50 vs. 0.04 at 9 months (OR, 22.0; 95% CI, 2.54–190;  $p = 0.005$ ); and 0.3 vs. 0 at 12 months (all patients in the physician-choice group had progressed) (Table 2).

The median time of follow-up was 10.5 months for the ChemolD assay-guided group and 6.2 months for the physician-choice group at the time of the interim efficacy analysis data cutoff. The median time of follow-up at ITT analysis was 10.5 months for the ChemolD assay-guided group and 7.5 months for the physician-choice group.

A post-randomization analysis of the demographics and baseline clinical characteristics of all randomized subjects demonstrated that subjects were balanced between the two study groups (Table 1). *MGMT* methylation status and *IDH1/IDH2* gene status (mutated vs. wild type) indicated that in both arms, most patients had unfavorable prognoses (i.e., unmethylated *MGMT* promoter and wild-type *IDH1/IDH2*). None of the patients used the NovoTTF-100L system (Optune) during the study.

**ChemolD assay-guided therapy increased OS and progression-free survival (PFS) of patients with rGBM**

A statistically significant difference was observed in the risk of death between groups (hazard ratio [HR] = 0.44; 95% confidence interval [CI], 0.24–0.81;  $p = 0.008$ ) in the interim efficacy analysis. In the ChemolD assay-guided group, 67% of patients (18 of 27) died vs. 87% (20 of 23) in the physician-choice group. Furthermore, median overall survival (mOS) was 12.5 months (95% CI, 10.2–14.7) with ChemolD assay-guided therapy vs. 9 (95% CI, 4.2–13.8) with physician choice (log rank  $p = 0.010$ ) (Figure 3A). As a secondary endpoint, survival was analyzed at 6, 9, and 12 months. The probability of survival for the ChemolD assay group was 0.85 vs. 0.61 for the physician-choice group at 6 months (odds ratio [OR], 3.53; 95% CI, 0.91–13.7;  $p = 0.068$ ), 0.70 vs. 0.48 at 9 months (OR, 2.51; 95% CI, 0.73–8.63;  $p =$

ChemolD assay-guided therapy continued to demonstrate meaningful clinical benefit in mOS throughout follow-up. In ITT analysis, a statistically significant difference was also observed in the risk of death between groups (HR = 0.52; 95% CI, 0.24–0.81;  $p = 0.008$ ). In the ChemolD assay-guided group, 70% of patients (30 of 43) died vs. 91% (32 of 35) in the physician-choice group. Furthermore, mOS was 12 months (95% CI, 10.8–13.2) with ChemolD assay-guided therapy vs. 7.5 (95% CI, 3.5–11.5) with physician choice (log rank  $p = 0.009$ ) (Figure 3C). Survival was analyzed at 6, 9, and 12 months as a secondary endpoint. The probability of survival for the ChemolD assay group was 0.79 vs. 0.57 for the physician-choice group at 6 months (OR, 2.75; 95% CI, 1.02–7.44;  $p = 0.046$ ), 0.62 vs. 0.47 at 9 months (OR, 1.80; 95% CI, 0.71–4.57;  $p = 0.217$ ), and 0.49 vs. 0.22 at 12 months (OR, 3.37; 95% CI, 1.16–9.82;  $p = 0.026$ ) (Table 3).

The mPFS was 6.5 months (95% CI, 3.3–9.7) for patients receiving ChemolD assay-guided therapy vs. 3.3 months (95% CI, 2.1–4.5) for physician-choice therapy (HR, 0.36; 95% CI, 0.23–0.57;  $p < 0.001$ ) (Figure 3D). The probability of PFS was greater in the ChemolD assay-guided group vs. the physician-choice group: 0.57 vs. 0.26 at 6 months (OR, 3.85; 95% CI, 1.45–10.2;  $p = 0.007$ ), 0.42 vs. 0.09 at 9 months (OR, 7.32; 95% CI, 1.92–27.9;  $p = 0.004$ ), and 0.24 vs. 0.03 at 12 months (OR, 10.3; 95% CI, 1.23–86.3;  $p = 0.032$ ) (Table 3).

**Exploratory analyses**

**ChemolD test results correlated with patients' OS and PFS**

Survival and PFS of each patient in the planned interim efficacy analysis were also analyzed as a function of the cell kill of the

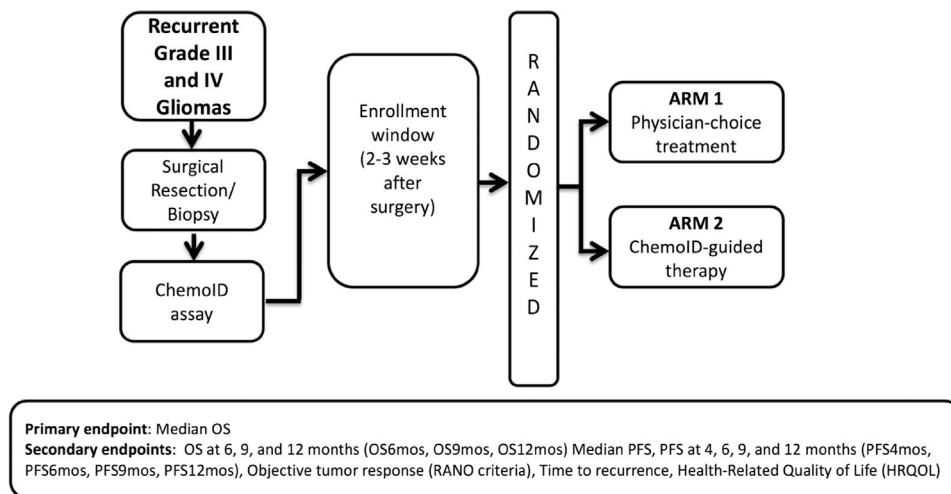

**Figure 2. Study schema of the registered clinical trial NCT03632135**

A multi-institutional, randomized clinical trial of patients with rGBM was initiated to assess the efficacy of chemotherapy regimens selected by the ChemoID assay vs. best physician choice. The primary efficacy endpoint of this trial was median OS. Secondary endpoints were OS at 6, 9, and 12 months, median PFS at 4, 6, 9, and 12 months, objective tumor response, time to recurrence, and health-related quality of life.

patient’s cultured tumor cells (both CSCs and bulk tumor cells) in response to the drug(s) used during treatment (Figure S1). Logistic regression models were constructed based on the ChemoID assay report data of patients’ cultured CSCs and bulk tumor cells exposed to the same drug(s) used during their treatment. We found that the optimal thresholds of tumor cell kill were 40% for CSCs and 55% for bulk tumor cells as per the logistic regression models (see referent lines in Figure S1). These thresholds agree with our previously published data.<sup>20–22</sup> For patients in the physician-choice arm, data points were broadly distributed over both axes, as expected given that treating physicians were blinded to the ChemoID data for patients in this arm. In striking contrast, most data points for patients in the ChemoID arm were clustered in the upper right quadrant (i.e., high percentage kill of both CSCs and bulk tumor cells).

Our analysis further revealed that for every 10% increase in CSC drug response, there was a significant increase (13%) in 6-month patient survival (HR, 0.87;  $p = 0.012$ ), and for every 10% increase in bulk tumor cell response, the hazard of death decreased 13% (HR, 0.87;  $p = 0.024$ ). We also found that for every 10% increase in cell kill, the hazard of progression at 6 months decreased by 14% for CSCs (HR, 0.86;  $p = 0.005$ ) and 18% for bulk tumor cells (HR, 0.82;  $p = 0.001$ ).

For survival trials, HR is the standard reporting mechanism; however, restricted mean survival time (RMST) is also a robust method for assessing the treatment effect.<sup>23</sup> We have analyzed the data using the 1- or 1.5-year RMST and CIs for each of our primary results to quantify the treatment effect and found that for the interim analysis, the mOS was 3.36 months (1.03–5.69) and the mPFS was 4.87 months (2.64–7.10). Instead for the ITT analysis, the mOS was 2.93 months (0.76–5.11), and the mPFS was 4.37 months (2.36–6.39). Additionally, we performed several Cox-Snell residual proportionality tests with the collected data, and all  $p$  values were 0.38 or greater.

In our exploratory studies, we also analyzed the cohort of patients with rGBM by removing subjects affected by *IDH1/IDH2* mutations. We found there was no effect on OS or PFS outcomes when subjects affected by *IDH1/IDH2* mutations were removed from the analysis.

The trial allowed the optional inclusion of BV during treatment because it has been shown in large trials and meta-analyses that BV treatment in combination with chemotherapy improves the management of symptoms and quality of life in patients with rGBM but not the OS.<sup>4,24</sup> We conducted an exploratory analysis stratifying in each arm the patients who had BV treatment along with chemotherapy and found that the use of BV in the ChemoID-guided group did not contribute to an advantage in their survival (11.5 months with BV vs. 12.5 months without BV). The survival in the ChemoID group was greater when subjects did not receive BV compared with subjects in the physician-choice group who did receive BV (12.5 months without BV vs. 10 months with BV), indicating that the OS advantage observed in the ChemoID-guided group was due to the use of the most effective chemotherapy regimen, independent from the use of BV (Figure S2A). Similarly, the use of BV in the ChemoID-guided group did not contribute to an advantage in their PFS (6.3 months with BV vs. 7 months without BV) (Figure S2B).

#### Correlation between chemotherapy treatments administered and the ChemoID test report predictions

The drug response to each chemotherapy and their combinations were analyzed to determine the proportion of patients who benefitted from a sensitive vs. non-sensitive chemotherapy chosen prospectively by the ChemoID assay. A pyramid diagram representation of the comparison in percent of cell kill of the most cytotoxic drugs found by the ChemoID assay compared with the actual cell kill percentages of the chemotherapy treatment used for both physician-choice and ChemoID-guided groups for each patient is shown in Figure S3. Optimal therapies with the highest

**Table 1. Patient demographics and baseline characteristics**

|                                                             | Physician choice (n = 35) | ChemolD guided (n = 43) | p value |
|-------------------------------------------------------------|---------------------------|-------------------------|---------|
| Age, mean (SD)                                              | 57.5 (10.7)               | 57.9 (13.1)             | 0.887   |
| Male, no. (%)                                               | 21 (60)                   | 28 (65)                 | 0.814   |
| Non-White, no. (%)                                          | 4 (11)                    | 7 (16)                  | 0.746   |
| <b>Histopathologic diagnosis,<sup>a</sup> no. (%)</b>       |                           |                         |         |
| Recurrent glioblastoma                                      | 35 (100)                  | 43 (100)                | >0.999  |
| <b>MGMT promoter methylation status, no. (%)</b>            |                           |                         |         |
| Methylated                                                  | 11 (31.4)                 | 15 (34.8)               | 0.812   |
| Unmethylated                                                | 24 (68.6)                 | 28 (65.2)               | 0.812   |
| <b>IDH1/IDH2 status, no. (%)</b>                            |                           |                         |         |
| Mutant                                                      | 3 (8.5)                   | 7 (16.2)                | 0.498   |
| Wild type                                                   | 32 (91.4)                 | 36 (83.7)               | 0.498   |
| Measurable lesions, no.                                     | 50                        | 66                      | NA      |
| Target lesion size, median (range), mm <sup>2</sup>         | 500 (200–1700)            | 500 (200–1900)          | >0.999  |
| <b>Site of target lesion(s), no. (%)</b>                    |                           |                         |         |
| Temporal lobe                                               | 22 (44)                   | 27 (41)                 | 0.731   |
| Frontal lobe                                                | 8 (16)                    | 15 (23)                 | 0.731   |
| Parietal lobe                                               | 12 (24)                   | 12 (18)                 | 0.731   |
| Occipital lobe                                              | 3 (6)                     | 7 (11)                  | 0.731   |
| Parietal and occipital                                      | 5 (10)                    | 5 (8)                   | 0.731   |
| Cerebellum                                                  | 0                         | 0                       | 0.731   |
| Brain stem                                                  | 0                         | 0                       | 0.731   |
| Insula                                                      | 0                         | 0                       | 0.731   |
| <b>Karnofsky performance status at study entry, no. (%)</b> |                           |                         |         |
| ≤80                                                         | 0                         | 0                       | >0.999  |
| ≥80                                                         | 35 (100)                  | 43 (100)                | >0.999  |
| <b>Corticosteroid use, no. (%)</b>                          |                           |                         |         |
| ≤2 mg/day                                                   | 2 (5.7)                   | 4 (9.3)                 | 0.879   |
| >2 to <4 mg/day                                             | 9 (25.7)                  | 9 (21)                  | 0.879   |
| ≥4 mg/day                                                   | 6 (17.1)                  | 6 (13.9)                | 0.879   |
| No                                                          | 18 (51.5)                 | 24 (55.8)               | 0.879   |

<sup>a</sup>Glioblastomas were diagnosed following the 2016 WHO classification.<sup>12</sup>

cell kill found by the ChemolD assay are shown in light colors and actual therapies used are shown in dark colors, with each row of the pyramid corresponding to results for a single patient. Results from the physician-choice group are shown in red, while those from the ChemolD-guided group are shown in blue. In Figure S3, the pyramid diagram on the left representing the physician-choice group shows longer light bars, indicating that the assay predicted more effective treatments than those prescribed by the physicians. In particular, 64.5% of subjects in the physician-choice group were treated with drugs that were not in accordance with the ChemolD assay prediction, and only 35.5% of subjects were treated with drugs that were found effective by the assay. In the ChemolD-guided group, 80.5% of subjects were treated with responsive drugs as predicted by the ChemolD assay, and 19.5% of the subjects were treated with less effective drugs due to their clinical health status (Table S2; Figure S1).

The distribution of cell kill predicted by the assay for the bulk of the tumor and the CSC assay of the drugs that were used to treat subjects in the physician-choice vs. the ChemolD-guided group is shown in Figure S4.

### Grade III/IV CRAEs association with chemotherapy in ITT analysis

The relative percentage of grade III/IV chemotherapy-related adverse effects (CRAEs) in ITT analysis was lower in the ChemolD assay-guided group (51%) vs. the physician-choice group (79%), with no unexpected neurological CRAEs or deaths due to CRAEs in either arm (Table S3). Toxicity side effects were consistent with the known safety profiles of the cytotoxic drugs used (i.e., no new safety concerns were observed). Thus, drugs predicted by the ChemolD assay did not cause more adverse effects than drugs chosen by physicians in the control group.

### DISCUSSION

To improve the outcome of rGBM, it is critical to use chemotherapies that are effective against the CSCs as they are proven to drive tumor development and relapse. We conducted a randomized clinical trial using the ChemolD CSC assay to guide chemotherapy for rGBM treatment. It is worth noting that patients in both arms were treated with a regimen chosen from the same panel of chemotherapy medications, with one group using the patient-specific ChemolD test report to guide chemotherapy selection and the other relying on the physicians' best judgment.

Planned interim efficacy analysis showed that the ChemolD-guided group's mOS was 3.5 months longer than the physician-choice group's (12.5 vs. 9 months) (Figure 3A). Additionally, mPFS was 6.6 months longer for patients receiving ChemolD assay-guided therapy compared with the patients treated using best-physician-choice chemotherapy (10.1 vs. 3.5 months) (Figure 3B).

In the ITT analysis, the study continued to meet its primary endpoint. The mOS was 4.5 months longer for the ChemolD-guided group compared with the physician-choice group (12 vs. 7.5 months) (Figure 3C). Additionally, mPFS was 3.2 months longer for patients receiving ChemolD assay-guided therapy compared with the patients treated using the best-physician-choice chemotherapy (6.5 vs. 3.3 months) (Figure 3D).

To confirm the validity of the data analysis using the HR method to summarize the difference in survival curves between the two arms as described in the approved study protocol, we also analyzed the data using RMST. By analyzing the 1- or 1.5-year RMST and CIs for each of our primary results, we found that subjects who received ChemolD-guided therapy had a significant survival advantage, which proves that using other robust statistical analysis methods, the survival differences between the two groups were statistically significant. The data support the use of the ChemolD assay for guiding chemotherapy selection for rGBM. The OS and PFS advantages observed for the ChemolD-guided group are not due to differences in prognostic variables, such as age, sex, performance status, MGMT promoter methylation status, or IDH1/IDH2 gene status since all these variables were balanced during randomization between the two arms. Since the mutations of the IDH1/IDH2 genes could

Prespecified Interim Efficacy Analysis

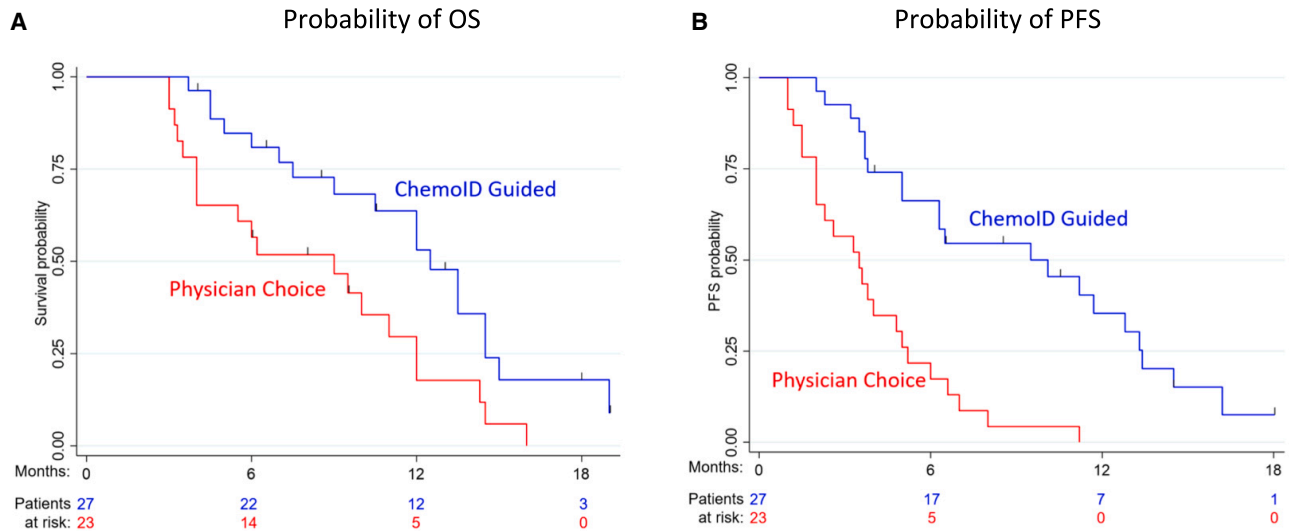

Intention to Treat Analysis

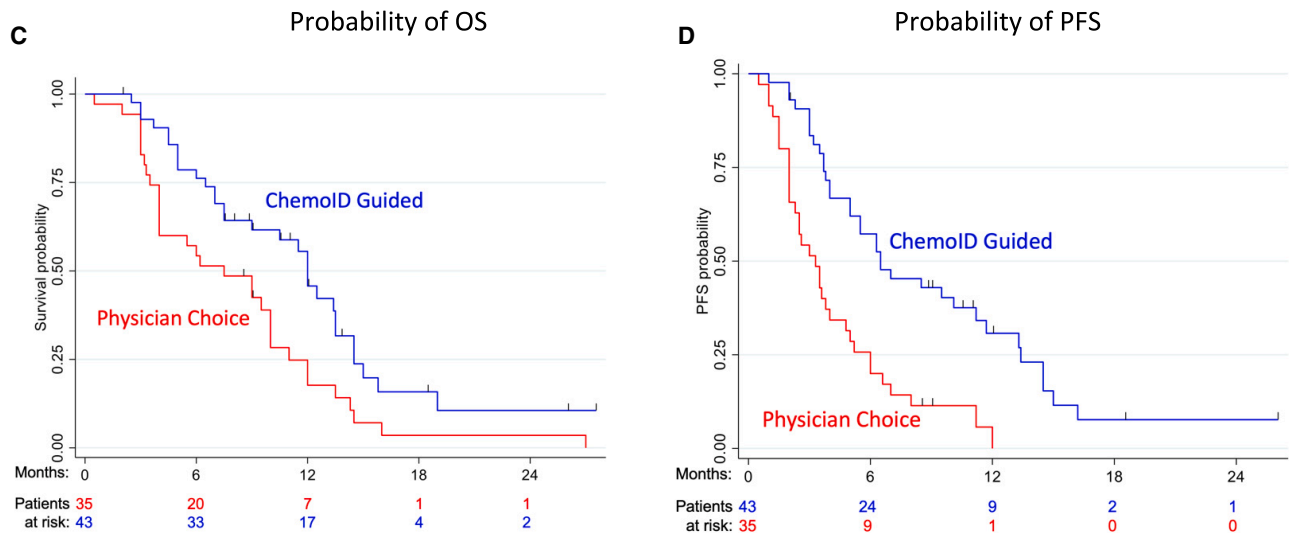

**Figure 3. OS and PFS are significantly improved by ChemolD-guided therapy**

(A) Prespecified interim efficacy analysis of OS. The number of events; median OS; OS rates at 0, 6, 12, and 18 months; and the Kaplan-Meier curve for OS in all patients treated with ChemolD-guided (blue) vs. physician-choice (red) therapies. Symbols, censored observations.

(B) Prespecified interim efficacy analysis of PFS. The number of events; median PFS; PFS rates at 0, 6, 12, and 18 months; and the Kaplan-Meier curve for PFS per investigator assessment in patients treated with ChemolD-guided (blue) vs. physician-choice (red) therapies. Symbols indicate censored observations.

(C) Intention-to-treat analysis of OS. The number of events; median OS; OS rates at 0, 6, 12, and 18 months; and the Kaplan-Meier curve for OS in all patients treated with ChemolD-guided (blue) vs. physician-choice (red) therapies. Symbols, censored observations.

(D) Intention-to-treat Analysis of PFS. The number of events; median PFS; PFS rates at 0, 6, 12, and 18 months; and the Kaplan-Meier curve for PFS per investigator assessment in patients treated with ChemolD-guided (blue) vs. physician-choice (red) therapies. Symbols indicate censored observations. A Cox proportional hazards model estimated hazard ratios (HRs) and CIs.

still cause differences in the results between the groups analyzed, we reanalyzed the data by removing subjects with mutant IDH1/IDH2 genes and found that the OS and PFS results remained unchanged.

The current SOC treatment protocol for GBM is a combination of surgical resection, radiotherapy, and concomitant TMZ chemotherapy followed by maintenance TMZ as demonstrated in the EORTC-NCIC trial.<sup>1,2</sup> TMZ is a key component of standard

**Table 2. Secondary endpoints: Interim efficacy analysis of OS and PFS probability**

| OS (months)  | OS probability, ChemolD guided  | OS probability, physician choice  | Odds ratio (OR) | 95% CI          | p value         |
|--------------|---------------------------------|-----------------------------------|-----------------|-----------------|-----------------|
| 6            | 0.85                            | 0.61                              | 3.53            | 0.91–13.7       | 0.068           |
| 9            | 0.70                            | 0.48                              | 2.51            | 0.73–8.63       | 0.143           |
| 12           | 0.57                            | 0.25                              | 4.00            | 1.06–15.1       | 0.041           |
| PFS (months) | PFS probability, ChemolD guided | PFS probability, physician-choice | OR              | 95% CI          | p value         |
| 6            | 0.65                            | 0.22                              | 6.80            | 1.89–24.4       | 0.003           |
| 9            | 0.50                            | 0.04                              | 22.00           | 2.54–190.0      | 0.005           |
| 12           | 0.30                            | 0.00                              | NC <sup>a</sup> | NC <sup>a</sup> | NC <sup>a</sup> |

<sup>a</sup>NC, not calculable.

therapy for patients both newly diagnosed and with rGBM. In newly diagnosed GBM, the addition of TMZ to radiotherapy resulted in 2.5 months of survival benefit, which led to TMZ being approved as a SOC.<sup>2,25</sup> However, most patients with GBM experience recurrence and have a poor prognosis following the SOC treatment protocol. Treatment options after recurrence are limited, and no recent randomized clinical trial has demonstrated median survival longer than 10 months in rGBM,<sup>10,26</sup> which is similar to the mOS of patients enrolled in the control group (best physician choice) of our trial. This randomized study demonstrates that using the ChemolD CLIA-certified clinical laboratory assay to select effective cytotoxic therapies for the treatment of rGBM is a promising and cost-effective strategy for increasing the survival of patients.

Of note, the use of anti-CSC-guided therapy resulted in a 3.5-month mOS advantage when compared with the control group in the population evaluated at the interim efficacy analysis and a 4.5-month mOS advantage in the ITT population. A significant difference was observed in the risk of death between the two groups. More participants survived in the ChemolD assay-guided group compared with the non-guided group at 6, 9, and 12 months, demonstrating that patients with rGBM derive a survival benefit from treatment with CSC-directed therapy.

In conclusion, the ChemolD assay was developed as an actionable tool for physicians to individualize cancer treatment by selecting the most effective therapies against CSCs from a panel of cytotoxic agents that are common and affordable for cancer patients. Treatments with more expensive targeted

anti-cancer drugs and immunotherapies are not always feasible due to socioeconomic and health disparity issues in the US and around the world. Although there are newer targeted therapies, our clinical trial focused on screening SOC chemotherapies that are routinely covered and used by community oncologists globally. The results of our study highlight the clinical effectiveness of a personalized approach to treatment. The ability of the ChemolD assay to personalize chemotherapy selection is a promising way to provide more affordable treatment for patients with rGBM. The ChemolD assay is versatile, allowing it to be expanded to include other new agents. We anticipate personalized anti-cancer therapy targeting CSCs will be included sooner in the treatment plan, eliminating ineffective treatments and allowing patients to gain the greatest therapeutic benefit possible.

#### Limitations of the study

Although this study provides good treatment options for patients with rGBM, some potential limitations should be noted. For example, ChemolD is a functional assay limited by the availability of viable tumor tissue samples. Our study only included rGBM subjects who underwent surgical resection or biopsy. Subjects with inoperable tumors or who were in poor health were not participants in our study. Future studies should incorporate patients with newly diagnosed *MGMT* unmethylated GBM, who would benefit from assay-guided intervention. In addition, further studies should investigate the use of genomic assays with this functional assay in larger cohorts for guiding treatment.

**Table 3. Secondary endpoints: ITT analysis of OS and PFS probability**

| OS (months)  | OS probability, ChemolD guided  | OS probability, physician choice  | Odds ratio (OR) | 95% CI    | p value |
|--------------|---------------------------------|-----------------------------------|-----------------|-----------|---------|
| 6            | 0.79                            | 0.57                              | 2.75            | 1.02–7.44 | 0.046   |
| 9            | 0.62                            | 0.47                              | 1.80            | 0.71–4.57 | 0.217   |
| 12           | 0.49                            | 0.22                              | 3.37            | 1.16–9.82 | 0.026   |
| PFS (months) | PFS probability, ChemolD guided | PFS probability, physician choice | OR              | 95% CI    | p value |
| 6            | 0.57                            | 0.26                              | 3.85            | 1.45–10.2 | 0.007   |
| 9            | 0.42                            | 0.09                              | 7.32            | 1.92–27.9 | 0.004   |
| 12           | 0.24                            | 0.03                              | 10.3            | 1.23–86.3 | 0.032   |



## STAR★METHODS

Detailed methods are provided in the online version of this paper and include the following:

- **KEY RESOURCES TABLE**
- **RESOURCE AVAILABILITY**
  - Lead contact
  - Materials availability
  - Data and code availability
- **EXPERIMENTAL MODEL AND SUBJECT DETAILS**
  - Patients
- **METHOD DETAILS**
  - Patient treatment
  - ARM 1 - Physician's choice of chemotherapy regimens
  - ARM 2 - ChemoID-guided drug response assay chemotherapy regimens
  - Patient follow-up
  - Clinical trial monitoring evaluations and measurements
  - Risk assessment
  - Patient tumor sample collection and processing
  - Isolation of cancer cells from tumor biopsies
  - Enrichment of cancer stem cells (CSCs)
  - Assessment of CSCs' and bulk of the tumor chemotherapy response
  - Reporting of the assay
- **QUANTIFICATION AND STATISTICAL ANALYSIS**
  - Baseline data
  - Efficacy analysis
  - Interim analysis

## SUPPLEMENTAL INFORMATION

Supplemental information can be found online at <https://doi.org/10.1016/j.xcrm.2023.101025>.

## ACKNOWLEDGMENTS

We thank all of the patients and their families who participated in this study. We are grateful to all coordinators and research staff at all study sites for their contributions. The authors gratefully acknowledge Logan Lawrence, Donna McIlvain, and Veronica Mayes for technical assistance with the assay. We thank Drs. Daniel Krummel and Josh Neman-Ebrahim for critically reviewing the manuscript. Cordgenics, LLC provided the funding support and resources for the ChemoID assay and had no role in the analysis and interpretation of the data. S.S. is supported by the Harold C. Schott Foundation. S.T.L. is partially supported by the Mississippi Center for Clinical and Translational Research and Mississippi Center of Excellence in Perinatal Research COBRE funded by the National Institute of General Medical Sciences of the National Institutes of Health under award numbers 5U54GM115428 and P20GM121334. C.M.H. is partially supported by the Mississippi Center for Clinical and Translational Research funded by the National Institute of General Medical Sciences of the National Institutes of Health under award number 5U54GM115428. The content is solely the responsibility of the authors and does not necessarily represent the official views of the National Institutes of Health.

## AUTHOR CONTRIBUTIONS

T.R., M.J.G., S.S., A.M.A., J.V., and P.P.C. designed the study. T.R., S.S., M.J.G., S.L.T., and C.M.H. drafted the manuscript. T.R., S.S., M.J.G., R.M.G., A.Y., D.A., R. Chaudhary, R. Chen, M.Z., C.L.-E., H.D.M., N.B., J.G.,

A.M., M.A., N.M., J.S., S.J., F.C., A.M.A., S.T.L., K.L.D., and C.M.H. carried out the investigation, had access to the data, interpreted the analyzed data, and had final responsibility for the decision to submit for publication. All authors critically reviewed the manuscript and approved the final version. An independent data manager and the senior authors had access to all of the data in the study and take responsibility for the integrity of the data. Two independent groups of statisticians had access to all of the data in the study and take responsibility for the accuracy of the data analysis.

## DECLARATION OF INTERESTS

P.P.C. and J.V. report ownership of intellectual property rights on the CSC platform technology licensed to Cordgenics, LLC.

## INCLUSION AND DIVERSITY

One or more of the authors of this paper self-identifies as an underrepresented ethnic minority in their field of research or within their geographical location. While citing references scientifically relevant for this work, we also actively worked to promote gender balance in our reference list.

Received: September 14, 2022

Revised: December 19, 2022

Accepted: April 10, 2023

Published: May 2, 2023

## REFERENCES

1. Stupp, R., Hegi, M.E., Mason, W.P., van den Bent, M.J., Taphoorn, M.J.B., Janzer, R.C., Ludwin, S.K., Allgeier, A., Fisher, B., Belanger, K., et al. (2009). Effects of radiotherapy with concomitant and adjuvant temozolomide versus radiotherapy alone on survival in glioblastoma in a randomised phase III study: 5-year analysis of the EORTC-NCIC trial. *Lancet Oncol.* 10, 459–466. [https://doi.org/10.1016/S1470-2045\(09\)70025-7](https://doi.org/10.1016/S1470-2045(09)70025-7).
2. Stupp, R., Mason, W.P., van den Bent, M.J., Weller, M., Fisher, B., Taphoorn, M.J.B., Belanger, K., Brandes, A.A., Marosi, C., Bogdahn, U., et al. (2005). Radiotherapy plus concomitant and adjuvant temozolomide for glioblastoma. *N. Engl. J. Med.* 352, 987–996. <https://doi.org/10.1056/NEJMoa043330>.
3. Vargas López, A.J. (2021). Glioblastoma in adults: a Society for Neuro-Oncology (SNO) and European Society of Neuro-Oncology (EANO) consensus review on current management and future directions. *Neuro Oncol.* 23, 502–503. <https://doi.org/10.1093/neuonc/noaa287>.
4. Gramatzki, D., Roth, P., Rushing, E.J., Weller, J., Andrantschke, N., Hofer, S., Korol, D., Regli, L., Pangalu, A., Pless, M., et al. (2018). Bevacizumab may improve quality of life, but not overall survival in glioblastoma: an epidemiological study. *Ann. Oncol.* 29, 1431–1436. <https://doi.org/10.1093/annonc/mdy106>.
5. Omuro, A., and DeAngelis, L.M. (2013). Glioblastoma and other malignant gliomas: a clinical review. *JAMA* 310, 1842–1850. <https://doi.org/10.1001/jama.2013.280319>.
6. Vredenburgh, J.J., Desjardins, A., Herndon, J.E., 2nd, Dowell, J.M., Reedon, D.A., Quinn, J.A., Rich, J.N., Sathornsumetee, S., Gururangan, S., Wagner, M., et al. (2007). Phase II trial of bevacizumab and irinotecan in recurrent malignant glioma. *Clin. Cancer Res.* 13, 1253–1259. <https://doi.org/10.1158/1078-0432.CCR-06-2309>.
7. Vredenburgh, J.J., Desjardins, A., Herndon, J.E., 2nd, Marcelllo, J., Reedon, D.A., Quinn, J.A., Rich, J.N., Sathornsumetee, S., Gururangan, S., Sampson, J., et al. (2007). Bevacizumab plus irinotecan in recurrent glioblastoma multiforme. *J. Clin. Oncol.* 25, 4722–4729. <https://doi.org/10.1200/JCO.2007.12.2440>.
8. Weller, M., Cloughesy, T., Perry, J.R., and Wick, W. (2013). Standards of care for treatment of recurrent glioblastoma—are we there yet? *Neuro Oncol.* 15, 4–27. <https://doi.org/10.1093/neuonc/nos273>.

9. Weller, M., van den Bent, M., Tonn, J.C., Stupp, R., Preusser, M., Cohen-Jonathan-Moyal, E., Henriksson, R., Le Rhun, E., Balana, C., Chinot, O., et al. (2017). European Association for Neuro-Oncology (EANO) guideline on the diagnosis and treatment of adult astrocytic and oligodendroglial gliomas. *Lancet Oncol.* *18*, e315–e329. [https://doi.org/10.1016/S1470-2045\(17\)30194-8](https://doi.org/10.1016/S1470-2045(17)30194-8).
10. Reardon, D.A., Brandes, A.A., Omuro, A., Mulholland, P., Lim, M., Wick, A., Baehring, J., Ahluwalia, M.S., Roth, P., Bähr, O., et al. (2020). Effect of nivolumab vs bevacizumab in patients with recurrent glioblastoma: the CheckMate 143 phase 3 randomized clinical trial. *JAMA Oncol.* *6*, 1003–1010. <https://doi.org/10.1001/jamaoncol.2020.1024>.
11. Battle, E., and Clevers, H. (2017). Cancer stem cells revisited. *Nat. Med.* *23*, 1124–1134. <https://doi.org/10.1038/nm.4409>.
12. Lin, E.H., Jiang, Y., Deng, Y., Lapsiwala, R., Lin, T., and Blau, C.A. (2008). Cancer stem cells, endothelial progenitors, and mesenchymal stem cells: “seed and soil” theory revisited. *Gastrointest. Cancer Res.* *2*, 169–174.
13. Islami, F., Guerra, C.E., Minihaan, A., Yabroff, K.R., Fedewa, S.A., Sloan, K., Wiedt, T.L., Thomson, B., Siegel, R.L., Nargis, N., et al. (2022). American Cancer Society’s report on the status of cancer disparities in the United States, 2021. *CA A Cancer J. Clin.* *72*, 112–143. <https://doi.org/10.3322/caac.21703>.
14. Mao, J.J., Pillai, G.G., Andrade, C.J., Ligibel, J.A., Basu, P., Cohen, L., Khan, I.A., Mustian, K.M., Puthiyedath, R., Dhiman, K.S., et al. (2022). Integrative oncology: addressing the global challenges of cancer prevention and treatment. *CA A Cancer J. Clin.* *72*, 144–164. <https://doi.org/10.3322/caac.21706>.
15. Lathia, J.D., Mack, S.C., Mulkearns-Hubert, E.E., Valentim, C.L.L., and Rich, J.N. (2015). Cancer stem cells in glioblastoma. *Genes Dev.* *29*, 1203–1217. <https://doi.org/10.1101/gad.261982.115>.
16. Dirkse, A., Golebiewska, A., Buder, T., Nazarov, P.V., Muller, A., Poovaithingal, S., Brons, N.H.C., Leite, S., Sauvageot, N., Sarkisian, D., et al. (2019). Stem cell-associated heterogeneity in Glioblastoma results from intrinsic tumor plasticity shaped by the microenvironment. *Nat. Commun.* *10*, 1787. <https://doi.org/10.1038/s41467-019-09853-z>.
17. Galdieri, L., Jash, A., Malkova, O., Mao, D.D., DeSouza, P., Chu, Y.E., Salter, A., Campian, J.L., Naegle, K.M., Brennan, C.W., et al. (2021). Defining phenotypic and functional heterogeneity of glioblastoma stem cells by mass cytometry. *JCI Insight* *6*, e128456. <https://doi.org/10.1172/jci.insight.128456>.
18. Chen, J., Li, Y., Yu, T.S., McKay, R.M., Burns, D.K., Kernie, S.G., and Parada, L.F. (2012). A restricted cell population propagates glioblastoma growth after chemotherapy. *Nature* *488*, 522–526. <https://doi.org/10.1038/nature11287>.
19. Adorno-Cruz, V., Kibria, G., Liu, X., Doherty, M., Junk, D.J., Guan, D., Hubert, C., Venere, M., Mulkearns-Hubert, E., Sinyuk, M., et al. (2015). Cancer stem cells: targeting the roots of cancer, seeds of metastasis, and sources of therapy resistance. *Cancer Res.* *75*, 924–929. <https://doi.org/10.1158/0008-5472.CAN-14-3225>.
20. Howard, C.M., Valluri, J., Alberico, A., Julien, T., Mazagri, R., Marsh, R., Alastair, H., Cortese, A., Griswold, M., Wang, W., et al. (2017). Analysis of Chemopredictive assay for targeting cancer stem cells in glioblastoma patients. *Transl. Oncol.* *10*, 241–254. <https://doi.org/10.1016/j.tranon.2017.01.008>.
21. Ranjan, T., Howard, C.M., Yu, A., Xu, L., Aziz, K., Jho, D., Leonardo, J., Hameed, M.A., Karlovits, S.M., Wegner, R.E., et al. (2020). Cancer stem cell chemotherapeutics assay for prospective treatment of recurrent glioblastoma and progressive anaplastic glioma: a single-institution case series. *Transl. Oncol.* *13*, 100755. <https://doi.org/10.1016/j.tranon.2020.100755>.
22. Howard, C.M., Zgheib, N.B., Bush, S., 2nd, DeEulis, T., Cortese, A., Mollo, A., Lirette, S.T., Denning, K., Valluri, J., and Claudio, P.P. (2020). Clinical relevance of cancer stem cell chemotherapeutic assay for recurrent ovarian cancer. *Transl. Oncol.* *13*, 100860. <https://doi.org/10.1016/j.tranon.2020.100860>.
23. Royston, P., and Parmar, M.K.B. (2013). Restricted mean survival time: an alternative to the hazard ratio for the design and analysis of randomized trials with a time-to-event outcome. *BMC Med. Res. Methodol.* *13*, 152. <https://doi.org/10.1186/1471-2288-13-152>.
24. Hertler, C., Seystahl, K., Le Rhun, E., Wirsching, H.G., Roth, P., Weller, M., and Gramatzki, D. (2022). Improved seizure control in patients with recurrent glioblastoma treated with bevacizumab. *Neuro Oncol.* *24*, 2001–2004. <https://doi.org/10.1093/neuonc/noac172>.
25. Johnson, D.R., and O’Neill, B.P. (2012). Glioblastoma survival in the United States before and during the temozolomide era. *J. Neuro Oncol.* *107*, 359–364. <https://doi.org/10.1007/s11060-011-0749-4>.
26. Friedman, H.S., Prados, M.D., Wen, P.Y., Mikkelsen, T., Schiff, D., Abrey, L.E., Yung, W.K.A., Paleologos, N., Nicholas, M.K., Jensen, R., et al. (2009). Bevacizumab alone and in combination with irinotecan in recurrent glioblastoma. *J. Clin. Oncol.* *27*, 4733–4740. <https://doi.org/10.1200/JCO.2008.19.8721>.
27. Louis, D.N., Perry, A., Reifenberger, G., von Deimling, A., Figarella-Branger, D., Cavenee, W.K., Ohgaki, H., Wiestler, O.D., Kleihues, P., and Ellison, D.W. (2016). The 2016 world health organization classification of tumors of the central nervous system: a summary. *Acta Neuropathol.* *131*, 803–820. <https://doi.org/10.1007/s00401-016-1545-1>.
28. Louis, D.N., Perry, A., Wesseling, P., Brat, D.J., Cree, I.A., Figarella-Branger, D., Hawkins, C., Ng, H.K., Pfister, S.M., Reifenberger, G., et al. (2021). The 2021 WHO classification of tumors of the central nervous system: a summary. *Neuro Oncol.* *23*, 1231–1251. <https://doi.org/10.1093/neuonc/noab106>.
29. Wen, P.Y., Macdonald, D.R., Reardon, D.A., Cloughesy, T.F., Sorensen, A.G., Galanis, E., Degroot, J., Wick, W., Gilbert, M.R., Lassman, A.B., et al. (2010). Updated response assessment criteria for high-grade gliomas: response assessment in neuro-oncology working group. *J. Clin. Oncol.* *28*, 1963–1972. <https://doi.org/10.1200/JCO.2009.26.3541>.
30. Chukwueke, U.N., and Wen, P.Y. (2019). Use of the Response Assessment in Neuro-Oncology (RANO) criteria in clinical trials and clinical practice. *CNS Oncol.* *8*, CNS28. <https://doi.org/10.2217/cns-2018-0007>.
31. Kelly, S.E., Di Benedetto, A., Greco, A., Howard, C.M., Sollars, V.E., Primerano, D.A., Valluri, J.V., and Claudio, P.P. (2010). Rapid selection and proliferation of CD133+ cells from cancer cell lines: chemotherapeutic implications. *PLoS One* *5*, e10035. <https://doi.org/10.1371/journal.pone.0010035>.
32. Mathis, S.E., Alberico, A., Nande, R., Neto, W., Lawrence, L., McCallister, D.R., Denvir, J., Kimmey, G.A., Mogul, M., Oakley, G., 3rd., et al. (2014). Chemo-predictive assay for targeting cancer stem-like cells in patients affected by brain tumors. *PLoS One* *9*, e105710. <https://doi.org/10.1371/journal.pone.0105710>.

STAR★METHODS

KEY RESOURCES TABLE

| REAGENT or RESOURCE                                  | SOURCE                           | IDENTIFIER                    |
|------------------------------------------------------|----------------------------------|-------------------------------|
| <b>Biological samples</b>                            |                                  |                               |
| Glioblastoma tissue samples                          | This Study                       | N/A                           |
| <b>Chemicals, peptides, and recombinant proteins</b> |                                  |                               |
| Carboplatin solution for Injection                   | Hospira Inc.                     | 00703-4244-01                 |
| Carmustine (BCNU)                                    | Sigma Chemical Company           | C0400-25MG                    |
| Etoposide Solution for Injection - 20 mg/ml          | Pfizer, Inc.                     | 16729-01114-31                |
| Imatinib Mesylate (STI571)                           | Selleck Chemicals, LLC           | 220127-57-1                   |
| Irinotecan Hydrochloride Injection                   | Pfizer, Inc.                     | 0009-7529-03                  |
| Lomustine (CCNU)                                     | Sigma Chemical Company           | L5918-100MG                   |
| Procarbazine (hydrochloride)                         | Cayman Chemical Company          | 16133                         |
| Temozolomide                                         | Cayman Chemical Company          | 14163                         |
| Vincristine Sulfate Injection                        | Hospira, A Pfizer Company        | 61703-0309                    |
| Accutase                                             | MP Biomedical LLC                | 91000449                      |
| Amphotericin-B                                       | Thermo Fisher Scientific (Gibco) | 15290018                      |
| Dimethyl Sulfoxide (DMSO)                            | Alfa Aesar                       | 67-68-5                       |
| Ethanol 200 Proof (Absolute)                         | Aldrich Chemical Company         | 64-17-5                       |
| Fetal Bovine Serum: Characterized, US-Sourced        | HyClone Laboratories, Inc.       | SH3087901                     |
| Gentamycin Sulfate                                   | Acros Organics                   | AC61398-0010                  |
| Penicillin-Streptomycin                              | Thermo Fisher Scientific (Gibco) | MT30001C1                     |
| Phosphate Buffered Saline (PBS) Tablets              | Life Technologies Corporation    | 18912014                      |
| RPMI-1640                                            | HyClone Laboratories, Inc.       | SH30027LS                     |
| Sterile Water                                        | Cardinal Health                  | 50-487-337                    |
| Thiazolyl Blue Tetrazolium Bromide (MTT)             | Sigma Chemical Company           | ICN 102227-01                 |
| Trypan Blue                                          | Acros Organics                   | AC189351000                   |
| <b>Experimental models: Cell lines</b>               |                                  |                               |
| Glioblastoma primary cell lines                      | This study                       | N/A                           |
| Glioblastoma Cancer Stem Cells                       | This study                       | N/A                           |
| <b>Software and algorithms</b>                       |                                  |                               |
| Cell Counting Software Nexcelom                      | Nexcelom                         | Cellometer Mini               |
| Softmax-Pro Molecular Devices                        | Molecular Devices                | Softmax Pro 7.0.3             |
| Encompass ChemID Data Analysis                       | In-House Programming             | Microsoft Office Excel 2016   |
| <b>Other</b>                                         |                                  |                               |
| Class II BioSafety Cabinet                           | Kewaunee                         | INT-4000                      |
| SpectraMax 340PC 384 Absorbance Microplate Reader    | Molecular Devices                | LNR06595 (SN), LNR066596 (SN) |
| Cellometer Mini Cell Counter                         | Nexcelom                         | SKU: Cellometer Mini          |
| Water Bath                                           | VWR                              | 28487 05X                     |
| Sorvall Legend XTR Centrifuge                        | Thermo Fisher Scientific         | 50119927-4                    |
| HERAcell CO <sub>2</sub> Incubator                   | Thermo Fisher Scientific         | 50115191B                     |
| Model 900 Series Ultra Low -80 Freezer               | Thermo Fisher Scientific         | 24020/FR-2145                 |
| Revco Laboratory Freezer -20                         | Thermo Fisher Scientific         | UFP430A                       |
| Rotating 3D-cell culture bioreactor                  | Cordgenics                       | CG0001                        |
| XS603S Analytical Balance                            | Mettler Toledo                   | 1126402591 (SN)               |
| Revco Laboratory Refrigerator                        | Thermo Fisher Scientific         | RGL5004                       |

(Continued on next page)

**Continued**

| REAGENT or RESOURCE                                                                        | SOURCE                   | IDENTIFIER                                      |
|--------------------------------------------------------------------------------------------|--------------------------|-------------------------------------------------|
| Zeiss Cell Culture Inverted Light Microscope                                               | Thermo Fisher Scientific | 491206-0011-000                                 |
| Sterile Single Use Serological Pipettes (5mL, 10mL, 25mL)                                  | Thermo Fisher Scientific | 1367811E, 1367811                               |
| Sterile Micropipette Tips (10 $\mu$ L, 20 $\mu$ L, 100 $\mu$ L, 200 $\mu$ L, 1000 $\mu$ L) | Thermo Fisher Scientific | 02-707-441, 02-707-402, 02-707-419, 02-100-503) |
| Tissue Culture Treated 10cc Petri Dishes (Biolite)                                         | Thermo Fisher Scientific | 12556002                                        |
| Tissue Culture Treated 96-well Flat Bottom Microplates                                     | Thermo Fisher Scientific | 12-556-008                                      |
| Sterile 1.5mL Microcentrifuge Tubes                                                        | Cardinal Health          | 02-681-258                                      |
| Sterile Conical Tubes (10mL, 50mL)                                                         | Thermo Fisher Scientific | 05-527-90, 06-443-19                            |
| Sterile Scalpels, Single Use                                                               | Cardinal Health          | 03-025-678                                      |
| Sterile Single Use Reservoir 25mL                                                          | Thermo Fisher Scientific | 14222399                                        |
| Parafilm                                                                                   | Thermo Fisher Scientific | P1150-2                                         |

**RESOURCE AVAILABILITY**

**Lead contact**

Further information and requests for resources and reagents should be directed to and will be fulfilled by the lead contact, Pier Paolo Claudio ([claudio@cordgenics.com](mailto:claudio@cordgenics.com)).

**Materials availability**

This study did not generate new unique reagents.

**Data and code availability**

- **Data:** The study protocol and statistical analysis plan will be available from the [lead contact](#) author upon request. The data that support the findings of this study are not openly available due to patient privacy, ethical, and legal issues. The de-identified participants' data that underlie the results reported in this article, will be made available upon reasonable request to investigators whose proposals for the use of the data have been approved by an independent review committee. Proposals may be submitted to the corresponding author beginning 12 months up to 18 months from the publication date.
- **Code:** This paper does not report original code.
- **General statement:** Any additional information required to reanalyze the data reported in this work is available from the [lead contact](#) upon request.

**EXPERIMENTAL MODEL AND SUBJECT DETAILS**

**Patients**

123 patients affected by recurrent GBM or grade III glioma were screened in this parallel-group randomized controlled clinical trial at 13 clinical sites across the US over a period of three years and assessed for inclusion and exclusion criteria to participate in the study ([Table S4](#)). Subjects eligible to participate in the study were men and women and members of all ethnic groups, at least 18 years old at the time of enrollment, who were affected by a surgically resectable first recurrence of grade-III glioma, and grade-IV recurrent glioblastoma (GBM), inclusive of gliosarcoma. In all cases, the diagnosis had to be confirmed by a pathologist according to the 2016-WHO classification of brain tumors.<sup>27</sup> Even though the primary inclusion requirement was the presence of recurrent grade-III glioma or grade-IV GBM, our trial only enrolled participants with 2016-WHO confirmed recurrent grade-IV glioma (rGBM). At the time that this clinical trial started enrolling patients, the WHO classification for brain tumors was in accordance with the 2016 guidelines. In August 2021, the updated 2021-WHO guidelines were published,<sup>28</sup> while our trial was completed in November 2021. All patients had already received first-line treatment with surgery, radiotherapy, and TMZ at the time of enrollment. Patients were excluded if they had another active malignancy or were receiving any other tumor-directed therapy (e.g., tumor treating fields device).

78 recurrent GBM patients were enrolled in the study (Consort Diagram – [Figure 1](#)). Registered participants provided an MRI (or CT if the patient was unable to have an MRI performed) of the brain with and without contrast within 14 days of the screening visit. Blood samples were drawn as per standard-of-care and used to confirm eligibility based on clinical laboratory parameters. Female participants had a urine or serum pregnancy test.

Subjects underwent surgical resection and biopsy. For histopathology confirmation and diagnosis of GBM, MGMT gene methylation status, and IDH-1/2 status, fresh tissue tumor biopsies from rGBM patients were sent to the sites' hospital pathology lab for processing. The central ChemolD laboratory conducted the drug response assay using a second portion of the fresh biopsies. In accordance with CLIA and CAP requirements, samples were shipped to the ChemolD laboratory utilizing a secure FedEx overnight shipping container for clinical specimens. All recurrent GBM patients who registered for the trial underwent the ChemolD assay and were randomly assigned by the sites' coordinators to a study group using a computer-generated algorithm (in REDCap).

The patients were treated either with the standard of care chemotherapy chosen by the physician (ARM 1) or treatment directed by the ChemolD assay (ARM 2), depending on the randomly allocated study group. Data collection was performed by a REDCap electronic data capture application software.

Chemotherapy medications were administered in accordance with the trial group to which each patient was assigned. Over the course of treatment, assessments of adverse events and drug compliance were made. Enrollment in the trial began in May 2018 after the lead institution completed the trial start-up procedures. Our trial was registered on [ClinicalTrials.gov](https://clinicaltrials.gov) with Identifier NCT03632135 in August 2018 after all clinical research agreements with participating institutions were completed, even though the FDA's Final Rule for Clinical Trials Registration considered our trial registration to be optional (42 CFR Part 11). A secure password-protected REDCap web portal was available for authorized study coordinators to input clinical trial data. Patients were blinded to randomization group assignment. Unblinding of test results was not permitted. Investigators and trial personnel were not aware of ChemolD test results for patients in the physician-choice therapy group until the end of the study. Investigators and trial personnel received the ChemolD lab test results **only** for subjects assigned to the assay-guided group. Data monitoring and analysis of results were conducted by independent statistical services and a data manager. Patient safety and adverse events (AEs) during the trial were monitored by an independent data safety monitoring board (DSMB).

The study protocol was approved by the Western Institutional Review Board (WIRB) and each of the independent ethics committees of the participating institution. This study was conducted in accordance with the Declaration of Helsinki and Good Clinical Practice (GCP) requirements described in the current revision of the International Conference on Harmonisation of Technical Requirements of Pharmaceuticals for Human Use (ICH) Guidelines and all applicable regulations, including current United States Code of Federal Regulations (CFR), Title 21, Parts 11, 50, 54, 56, and 312 and Title 45, Part 164. The IRB reviewed and approved the site's informed consent form (ICF), and any other written information that was used for patient recruitment. All patients signed the informed consent before enrollment.

## METHOD DETAILS

### Patient treatment

Lead investigators agreed on the cytotoxic chemotherapies used in the trial, and the health insurance plans covered them, thus study participants incurred no additional medical bills. The regimens and doses tested by the ChemolD drug response assay were the same as the ones that could be chosen by the physicians for patients enrolled in the control arm ([Table S1](#)).

Patients received 1 of 14 cytotoxic chemotherapy regimens either chosen by the physician or guided by the ChemolD assay test report ([Figure 2](#)). Physicians and investigators were not provided with ChemolD test reports for patients randomized to the physician-choice control arm. Regardless of which arm the patient was assigned to, the ChemolD test was performed on all subjects so that retrospective analysis could be conducted on patients randomly assigned to the Physician-choice group.

The assay-guided group received the regimen that killed the most cancer stem cells and the bulk of the tumor. The treatment given to subjects in the control group was chosen from the same list of chemotherapies tested by the assay ([Table S1](#)), based on the treating physician's best empirical judgment. The number of chemotherapy drug cycles in both trial arms was determined at the treating physician's discretion. Patients were, however, treated for a minimum of 4 cycles and continued to receive treatment until unacceptable toxicity, hospice or death, or consent withdrawal.

For patients in the assay-guided group, in the event of unacceptable toxicity or progression, treatment was changed to the next best chemotherapeutic drug or combination based on the ChemolD assay report. In cases in which the assay predicted more than one high-cell kill drug, for patients randomized to the assay-guided arm, the protocol gave the physicians the ability to choose a treatment among the high-cell kill drugs based on the ChemolD assay report that would benefit the patient, considering the patient's general health status.

Bevacizumab is not expected to improve overall survival<sup>4</sup> and was permitted in the clinical trial. If indicated, it was started at least 4 weeks following the craniotomy or biopsy, when the wound had healed well without any drainage or cellulitis.

In the absence of treatment delays due to the presence of adverse event(s), treatment continued as specified in the above treatment modality sections or until one of the following criteria was applicable: hospice or patients' death, intercurrent illness that prevents further administration of treatment, unacceptable adverse event(s), patient decides to withdraw consent for participation in the study, or general or specific changes in the patient's condition render the patient unacceptable for further treatment in the judgment of the investigator.

### ARM 1 - Physician's choice of chemotherapy regimens

Patients randomized to the physician-choice chemotherapy arm were treated with one of the regimens from the list of chemotherapies specified per the investigator's discretion. Patients received treatment as per standard practice and continued on the treatment until hospice or as per investigator's discretion if having continued response (SD, PR, or CR) and/or clinical benefit. The number of cycles of therapy administered as clinically appropriate was based on the health status, although it was recommended that patients should receive at least 4 cycles of therapy.

### ARM 2 - ChemolD-guided drug response assay chemotherapy regimens

The physician selected a treatment regimen based on ChemolD drug response assay results on cancer stem cells (CSC) and the bulk of tumor cells. Ideally, the regimen with the highest percentage cell-kill for cancer stem cells and the bulk of tumor combined was used; however, the physician had the flexibility to choose the best regimen according to anticipated patient tolerability. The regimens tested by the ChemolD drug response assay are the same as the ones that can be chosen by the Physician for patients enrolled in Arm 1.

### Patient follow-up

Participants were followed for three years according to standard-of-care intervals by neurologic and neurosurgical clinical assessments or until death. At 6 and 12 months after planned Visit 24 there was a phone call to assess survival status.

Participants were assessed at follow-up visits following standard-of-care treatments and chemotherapy drugs were dispensed according to groups and cohorts. Drug compliance and adverse event assessment were performed. Lab work and brain imaging were collected at visits as per standard-of-care.

The outpatient visits window was  $\pm 7$ –14 days from the intended date of the visit. Follow-up visits consisted of a clinical evaluation with particular attention to neurological function, seizures, and corticosteroid use as per standard-of-care management of the disease. Laboratory tests of blood counts, glucose levels, and blood count, liver function tests indicated if the participant was receiving chemotherapy, corticosteroids, and anti-epileptic drugs.

CT scan or MRI was performed as standard of care for the entire time patients are in the trial, and at any other time if clinically indicated based on symptoms or physical signs suggestive of progressive disease. Imaging assessments were discontinued once a patient was off of the clinical trial, hospice, or death. Patients were followed for overall survival during the clinical trial.

Participants were followed according to SOC intervals determined by neurologic and neurosurgical clinical assessments preferably with brain MRI scans pre- and post-intravenous gadolinium contrast unless the patient had a contraindication to gadolinium contrast then non-contrast brain MRI was obtained and or CT-scans of the brain pre and post intravenous contrast or without contrast, if the patient had a contraindication to CT intravenous contrast such as severe allergy and/or renal dysfunction.

During treatment, adverse events were assessed according to National Cancer Institute Common Terminology Criteria for Adverse Events (version 5.0). Post-chemotherapy, patients had follow-up visits every 3 months, during which neurological function and corticosteroid levels were assessed and contrast-enhanced MRIs were performed (in addition to the post-surgery/baseline MRI).

Response to chemotherapy was evaluated according to the 2D Response Assessment in Neuro-Oncology (RANO) criteria, in which in addition to contrast enhancement, tumor extension on T2- and fluid-attenuated inversion recovery (FLAIR)-weighted MRI are evaluated.<sup>29,30</sup>

Tumor assessments were performed by an independent neuro-radiology service composed of 2 readers and a third senior reader for adjudication of disagreements. All neuro-radiologists were blinded to groups and/or treatment assignments throughout the trial to determine the earliest time of progression independent of the impressions of the treating physicians to avoid bias.

A record of all concomitant (OTC & prescription) taken 30 days prior to the screening visit through study termination was taken.

### Clinical trial monitoring evaluations and measurements

From the medical chart (paper or electronic) this additional data was collected: age, gender, weight, pathology report, steroid and other medication doses over the course of treatment, ChemolD test results, MGMT gene methylation status, IDH-1 mutation status, chemotherapy regimens including doses, all brain imaging including but not limited to DICOM images of MRI and or CT scans, clinical assessment of disease at baseline and during the course of therapy from neuro-oncologic progress notes, Health-Related Quality of Life (HRQL) questionnaires addressing physical, psychological, emotional, and social issues.

### Risk assessment

The ChemolD assay was classified as a non-significant risk assay for patients by the ethics committees. The current study utilized only sample specimens obtained by established procedures that patients undergo routinely for the treatment of his/her recurrent cancer; there was no additional risk to the patient. Tissue for this study was obtained by patient consent and after it was assured that there was adequate tissue for routine histologic analysis. At no time tissue was obtained solely for carrying out the ChemolD assay. No investigational agents were included in the trial. There were no greater than minimal risks associated with this study since all chemotherapy drugs used were FDA-approved for the treatment of recurrent 2016-WHO grade III or IV gliomas.

### Patient tumor sample collection and processing

Inclusion criteria included patients 18 and older with first-recurrence of grade III or grade IV glioma (according to the 2016-WHO guideline classification),<sup>27</sup> who were able to provide fresh tissue of the primary lesion. After informed consent, eligible participants underwent surgical resection or stereotactic biopsy of the tumor as per standard of care. Fresh tissue biopsy samples were collected in the operating room under sterile conditions and divided into two parts. One part of the biopsy was sent for testing in a sterile vial containing RPMI transportation medium at room temperature via overnight FedEx clinical pack to the ChemolD laboratory. Upon arrival, patients' identifiers were recorded, and the tissue was triaged for the growth of bacteria and yeast/fungi and accepted at the ChemolD laboratory. The assay used in this study to guide treatment was performed by an independent hospital pathology laboratory regulated by the Centers for Medicare & Medicaid Services (CMS), which oversees all laboratory testing performed on humans in the U.S. through the Clinical Laboratory Improvement Amendments (CLIA) guidelines. The second portion of the biopsy was placed in a 10% formaldehyde solution and sent to the local pathology lab for histopathological confirmation to satisfy the main inclusion criterion. Tissue samples were also evaluated for methylation of the *MGMT* gene promoter and *IDH1/IDH2* gene mutation status. Post-surgery/biopsy, patients received a baseline contrast-enhanced brain MRI.

### Isolation of cancer cells from tumor biopsies

To generate the primary tumor cell cultures, the fresh brain tumor tissue from surgical biopsies was minced using sterile scalpel blades and gently dissociated in a biosafety cabinet using 0.025% trypsin solution at 37°C for 10 min with gentle agitation and intermittent resuspension. Dissociated tumor cells were plated in RPMI with 20% FBS, 1% Penicillin/Streptomycin, Gentamycin Sulfate (complete media) in sterile plastic Petri dishes in the presence of residual tumor tissues and incubated at 37°C humid tissue culture incubator in the presence of 5% CO<sub>2</sub>. Primary cancer cells were passaged to confluency and sub-cultured in complete media in additional sterile plastic Petri dishes.

### Enrichment of cancer stem cells (CSCs)

Patient-derived CSC cultures were obtained as previously described in.<sup>20,21,31,32</sup> The CSCs were enriched from the primary tumor cell cultures by loading a 3D cell culture rotating bioreactor (Cordgenics) with a volume of 40 mL and a gas-permeable membrane that allows for gas exchange where cells will aggregate in suspension to form spheroids or cell aggregates in the absence of shear forces.<sup>31,32</sup> The 3D-suspension cell culture rotating bioreactor, provides the capability to control the movement of air bubbles and removes them from the bioreactor without degrading the low-shear culture environment or the suspended three-dimensional tissue assemblies. This provides unparalleled control over the locations of cells and tissues within its bioreactor vessel during operation and sampling. Both the low-shear suspension of cells and control of the locations of cells and air bubbles are affected by means of the hydrodynamic force created by the flow within the vessel and fluid drag along the surface of the viscous spinner. A gas-permeable membrane connected to the base of the vessel enables the exchange of gas between the tissue culture medium in the vessel and an incubator environment in which the vessel is placed. The presence of a conic spinner on the axis of rotation of the cell culture rotating bioreactor enables the simultaneous creation of a low-shear culture environment and the "herding" of suspended cells and tissue assemblies, which is responsible for the CSCs' selective growth. A rotation rate of 15–25 rpm was estimated to have average shear values of 0.001 dyn per square centimeter, which is the rate at which medium-large, three-dimensional, tissue-like suspended growth assemblies have been successful. This 3D-suspension cell culture rotating bioreactor configuration was shown previously to select and enrich 15-fold cancer cell cultures expressing markers of CSCs such as CD133 among others.<sup>31</sup> Other conventional bioreactors rely instead on agitation to suspend cells and attachment materials and to facilitate the mass transfer required for the growth of cells and tissue assemblies. However, the shear force generated by agitation can affect cell-cell interactions and degrade three-dimensional tissue development.

CSCs from primary cancer cells (bulk of the tumor cells) were enriched by loading 2x10<sup>6</sup> bulk of tumor cells into the bioreactor and culturing them for 7- days in RPMI media in the absence of growth factors.<sup>20–22</sup> The rotating bioreactor was maintained in an incubator with constant CO<sub>2</sub>, temperature, 20% airflow, and at 20–25 rpm rotation speed. Validation of the bioreactor-enrichment of CSCs from GBM biopsies was achieved by immunophenotyping bulk of tumor and CSCs expression of CD133, CD24, and CD44 using flow cytometric analyses, and by xenografting the CSCs in immune-deficient mice in a limiting dilution assay to verify their tumor-initiating capacity *in vivo* as shown in [Figure S5](#) and [Table S5](#).<sup>20,31,32</sup>

### Assessment of CSCs' and bulk of the tumor chemotherapy response

Treatments with anti-cancer drugs and sensitivity tests were performed as described previously in.<sup>20,21,31,32</sup> The bulk of tumor cells and CSCs were counted using trypan blue exclusion to determine cell viability and cell number prior to chemosensitivity testing using a Cellometer mini automated cell counter.

96-well plates are seeded in RPMI-1640 with 10% FBS, penicillin and streptomycin with a minimum of 20,000 individual tumor cells per regimen of bulk tumor cells or CSCs in 5 replicas and incubated at 37°C in a 5% CO<sub>2</sub> incubator. After 24 h from plating, clinical-grade chemotherapy drugs were added alone or in combination for 1-h exposure at concentrations that do not exceed the serum C [max] described in pharmacokinetic (PK) studies, including the clinical dose. Three concentrations of each chemotherapy treatment

were prepared by serial dilution. Each concentration was added to five replicate wells on the microtiter plate. Additionally, three replicated wells (control 1 = no treatment) and three replicated wells (control 2 = equal amount of solvent) were associated with each treatment.

After the 1-h exposure, the treatment media containing the various chemotherapies were removed and replaced with fresh media. MTT assay was performed 24 h following chemotherapy treatment to assess cell survival as previously described.<sup>20–22</sup>

Inhibition of bulk tumor cells and CSCs survival was measured for each concentration (average counts in five replicates  $\pm$ SE) of a given treatment (for a total of 15–18 different treatments per patient). Survival of tumor cells at each concentration was calculated as compared to control-2 and the overall percent of the bulk of tumor cells and CSCs killed was calculated for each treatment as the primary measures of potential therapy efficacy.

### Reporting of the assay

Percent survival (potential therapeutic efficacy) was calculated relative to appropriate negative and positive controls for each treatment. Efficacy and resistance of each drug and combinations were reported on the ChemID assay results as a continuous number from <10% to 100% cell-kill as previously.<sup>20–22</sup>

### QUANTIFICATION AND STATISTICAL ANALYSIS

All statistical analyses followed the plan specified in the protocol with no deviations and were completed using Stata v17.1 (StataCorp) by independent biostatisticians. Two prespecified interim efficacy analyses were planned *a priori* at 35 and 70 death events (1/3 and 2/3 of the full target sample size number of events). The hazard ratio (HR) for ChemID-guided: Physician-choice to declare efficacy was <0.55 at all three-time points. The Lan-DeMets alpha spending approach was utilized to determine P-value stopping criteria for the two prespecified interim efficacy analyses. Efficacy could be declared at the first analysis if HR was <0.55 with an associated P-value <0.0167.

Baseline characteristics were compared using t-tests or Mann-Whitney U tests, as appropriate, for continuous and ordinal variables and Fisher's exact tests for categorical variables. Kaplan-Meier curves were constructed using established methods, and median survival was calculated from these curves. Primary OS and secondary (PFS) HRs were constructed using Cox proportional hazard models with baseline HRs stratified by clinical site. Variance component estimation was performed via bootstrap re-sampling using 1000 bootstrapped replicates. Specific time-point survival probabilities (6, 9, and 12 months) were calculated using marginal probabilities obtained via logistic regression models, and associated odds ratios were reported. Additionally, an exploratory analysis was performed using a 1- or 1.5-year restricted mean survival time (RMST) to quantify the treatment effects.

### Baseline data

As per protocol, initial analyses involved data cleaning, variable development, and exploratory data analyses. We used standard summaries to describe baseline characteristic distributions in terms of centrality, spread, shape, and possible outliers by arm, cohort, and treatment group. Graphical explorations emphasized the examination of the nature and extent of potential nonlinear relationships on the appropriate modeling scale (e.g. natural, log, logit, etc.)

### Efficacy analysis

The primary analysis was based on an intention-to-treat approach and included all subjects randomized at baseline. The primary efficacy outcome was overall survival (OS) in months. This outcome was compared between patients randomized to ChemID-guided chemotherapy versus standard of care. OS comparisons were examined using Cox Proportional Hazard Models for Overall Survival with baseline hazards stratified by site and medians were compared between treatment arms. Models examining adjustments for sex, race, age, and tumor stage were constructed, as well as for moderating effects of these variables (subpopulation investigations).

Secondary analyses included logistic regression models for Overall and Progression-Free Survival at 4, 6, 9, and 12 months, Cox Proportional Hazard Models for Progression-Free Survival in months, Generalized Linear Models (GLMs) for analyses on objective tumor response (RANO), and Health-Related Quality of Life (HRQOL). Generalized Linear Mixed Models (GLMMs) were used for analyses of changes in any additional repeated outcome measures to incorporate within-person associations and examine distributions of participant-specific declines. Huber-White robust standard errors were used, and multiple variance structures were investigated to examine the sensitivity of primary analyses to the choice of association model. Shared Parameter Models (SPM) were used to examine any potential informative missing data effects.

### Interim analysis

We performed a predetermined interim analysis as per protocol. From the clinical trial protocol, two interim analyses based on the alpha spending approach of Lan and DeMets could be performed. One would be performed whenever 35 patients had passed away. If both the observed HR was less than or equal to 0.55 and its related p-value was less than 0.0167, the trial may be stopped for efficacy at this point. If the trial continued, the second interim analysis would take place after 70 people had expired. If the observed HR was less than or equal to 0.55 and its corresponding p-value was lower than or equal to 0.0218, the trial could be stopped for efficacy at this point.



**Cell Reports Medicine, Volume 4**

**Supplemental information**

**Cancer stem cell assay-guided chemotherapy  
improves survival of patients with recurrent  
glioblastoma in a randomized trial**

**Tulika Ranjan, Soma Sengupta, Michael J. Glantz, Richard M. Green, Alexander Yu, Dawit Aregawi, Rekha Chaudhary, Ricky Chen, Mario Zuccarello, Christine Lu-Emerson, Hugh D. Moulding, Neil Belman, Jon Glass, Aaron Mammoser, Mark Anderson, Jagan Valluri, Nicholas Marko, Jason Schroeder, Steven Jubelirer, Frances Chow, Pier Paolo Claudio, Anthony M. Alberico, Seth T. Lirette, Krista L. Denning, and Candace M. Howard**

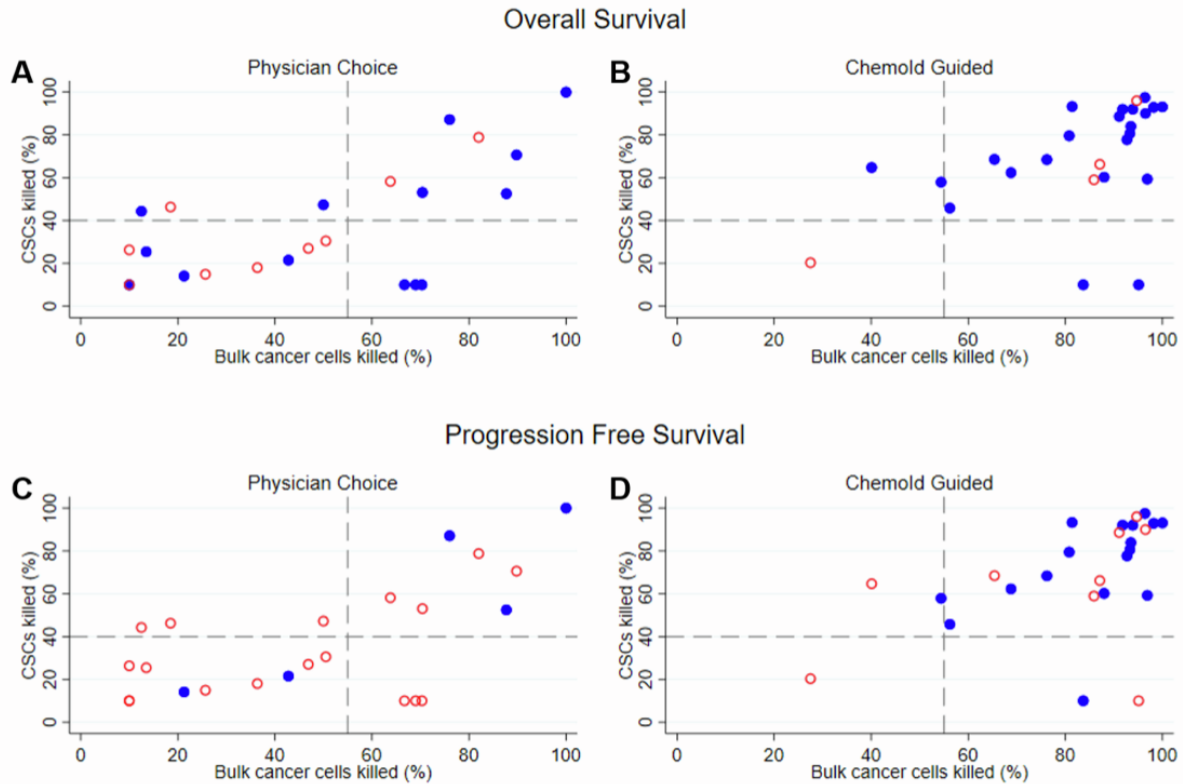

**Supplemental Figure 1. Patient' OS and PFS correlated with the cell kill of drugs used during treatment as per the Chemold test report, related to figure 3**

**A)** Quadrant diagrams of the associative analysis of cell kill percentages (bulk tumor cell and CSCs) vs patient OS at 6-months post-randomization. Open-red circles, participants who had died; solid blue circles, participants surviving.

**B)** Quadrant diagrams of the associative analysis of cell kill percentages (bulk tumor cell and CSC) vs patient PFS at 6-months post-randomization. Open red circles, participants who had progressed; solid blue circles, participants who had not progressed.

Referent lines, 40% for CSCs and 55% for bulk tumor cells indicate the optimal thresholds from the logistic regression models.

**A**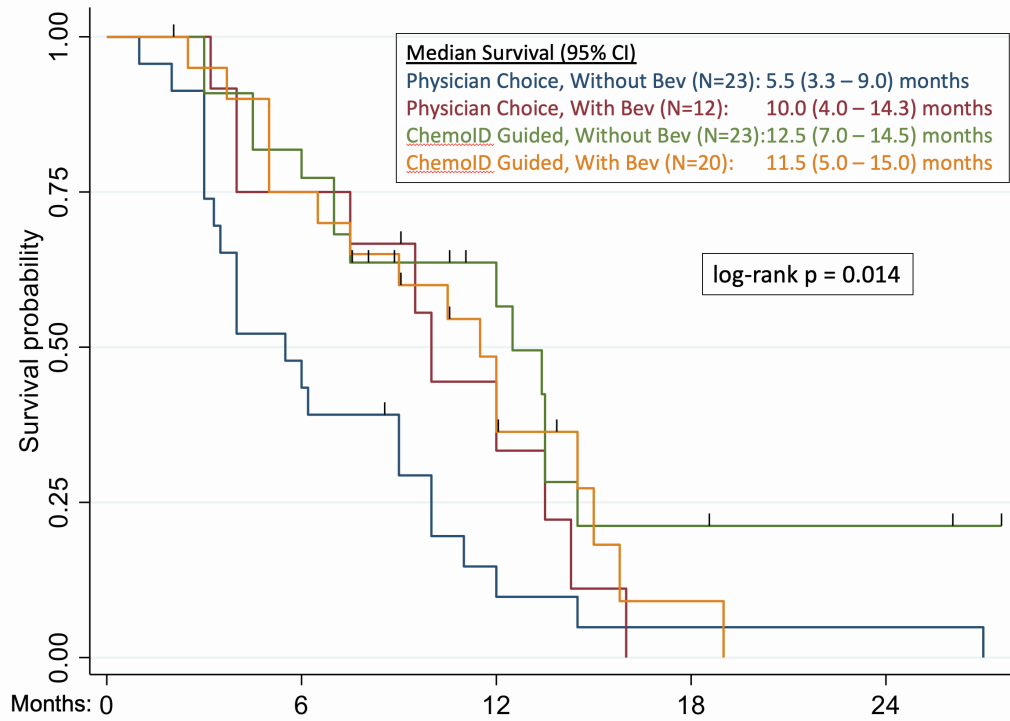**B**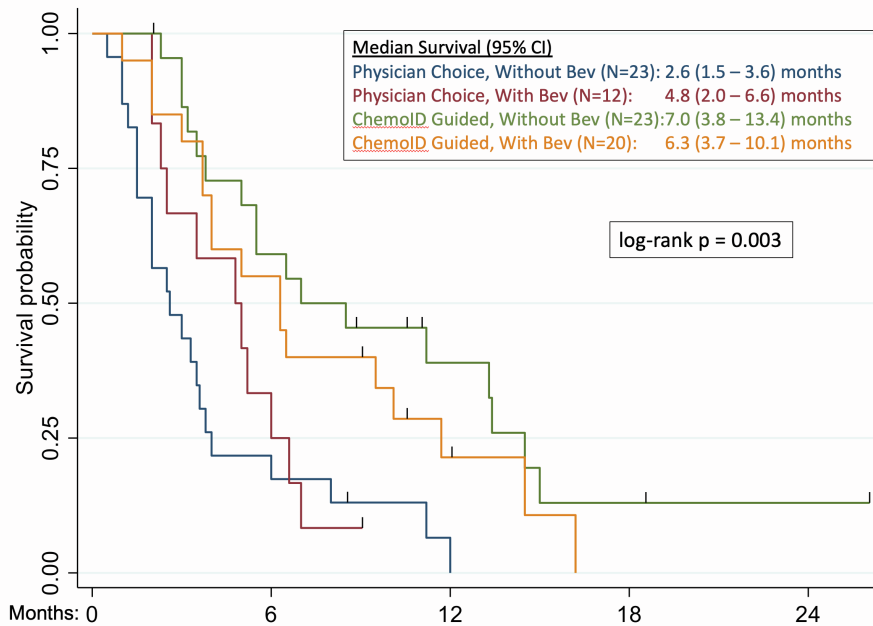

**Supplemental Figure 2. Kaplan Meier plots of OS and PFS stratified by the use of Bevacizumab during chemotherapy treatment, related to figure 3**

A) ITT Kaplan Meier analysis of OS

B) ITT Kaplan Meier analysis of Progression Free Survival (PFS)

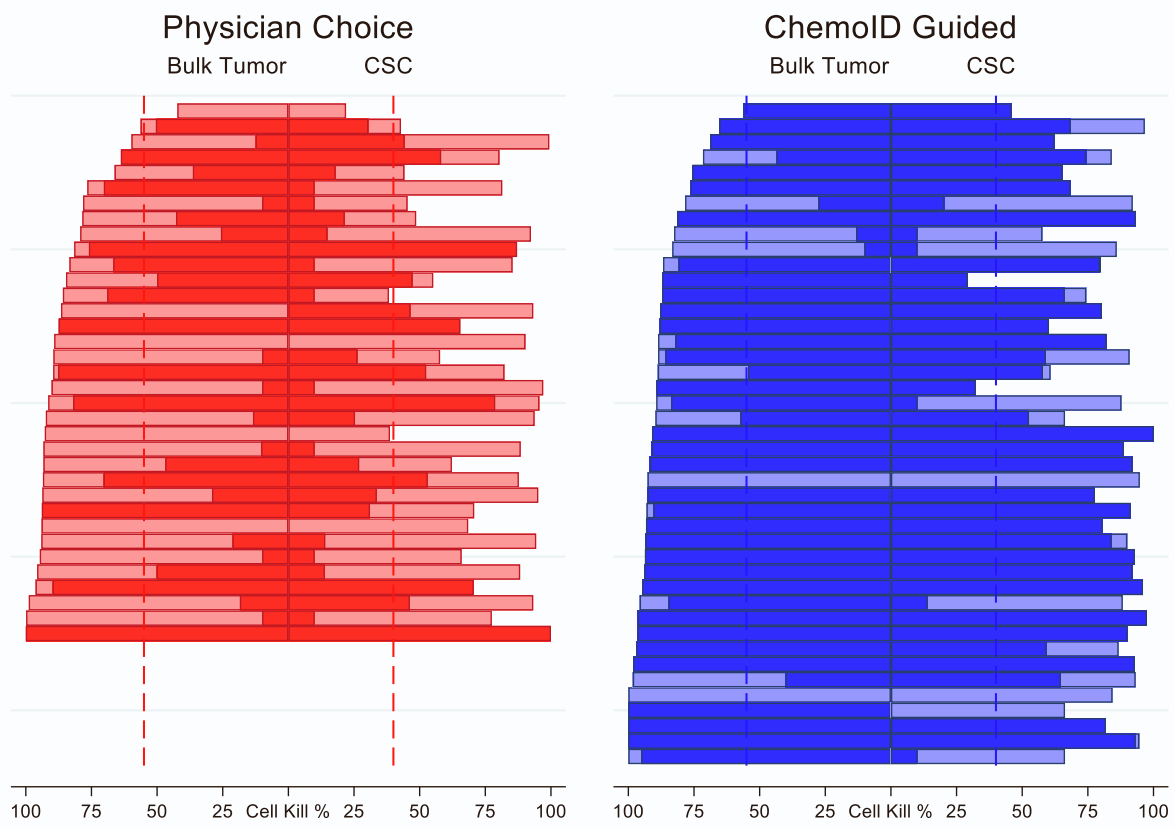

**Supplemental Figure 3. Comparison of the most effective drug found by the ChemoID assay from a panel of various chemotherapies versus the actual kill percentages of the chemotherapy treatment used in Physician Choice and ChemoID-Guided groups for each patient, related to figure 3**

Pyramid plot comparing CSC and bulk tests for each patient, showing the percent cell kill for the most effective drug as predicted by the ChemoID assay and the actual percent cell kill of the chemotherapy regimen utilized. ChemoID-identified optimal therapies with the highest cell kill are shown in light colors. Therapies used and their cell kill are shown in dark colors, with each row of the pyramid corresponding to results for a single patient. When the light bar is longer than the dark bar, the ChemoID assay identified a more optimal therapy than the one that was administered.

### Physician Choice

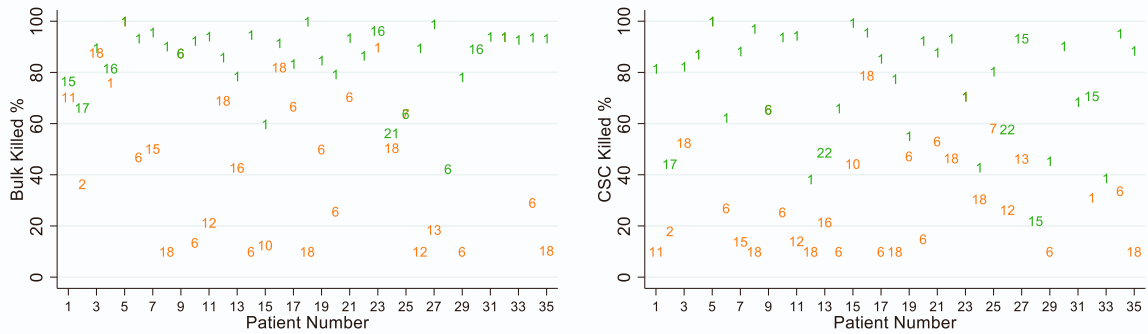

### ChemOID Guided

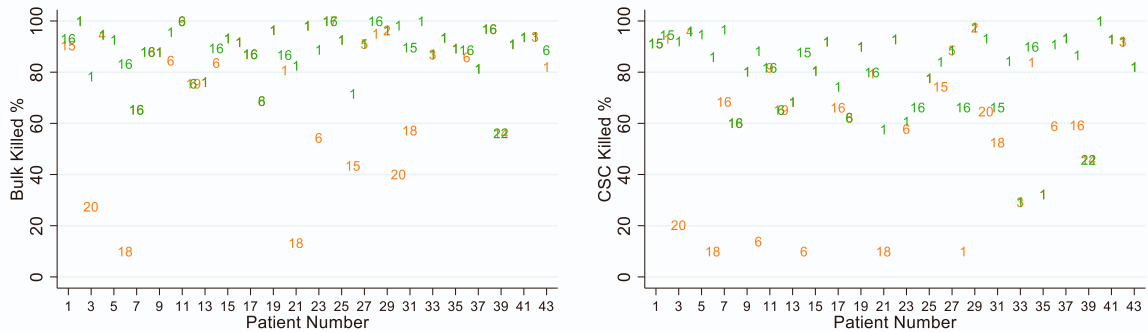

**Supplemental Figure 4. Cell-kill diagram for the panel of tested chemotherapy and their combinations across all subjects with patient numbers on the x-axis and drug observed cell-kill on the y-axis, related to figure 3**

Green numbers represent the ChemOID-identified best drug(s) and orange numbers are the drugs used for therapy. 1: BCNU; 2: BCNU, Carboplatin; 3: BCNU, Etoposide; 4: BCNU, Imatinib; 5: BCNU, Imatinib, Etoposide; 6: CCNU; 7: CCNU, Etoposide; 8: CCNU, Etoposide, TMZ, Imatinib; 9: CCNU, TMZ, Imatinib, Procarbazine, Etoposide; 10: Carboplatin, Irinotecan; 11: Carboplatin, TMZ, Irinotecan; 12: Etoposide; 13: Etoposide, Carboplatin; 14: Etoposide, Vincristine; 15: Imatinib; 16: Imatinib, TMZ; 17: Procarbazine, CCNU, Vincristine; 18: TMZ; 19: TMZ, CCNU; 20: TMZ, Carboplatin; 21: Irinotecan; 22: Vincristine.

A)

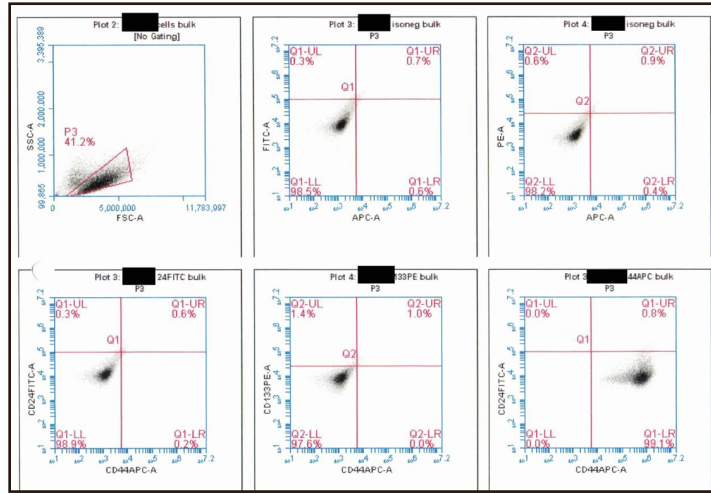

B)

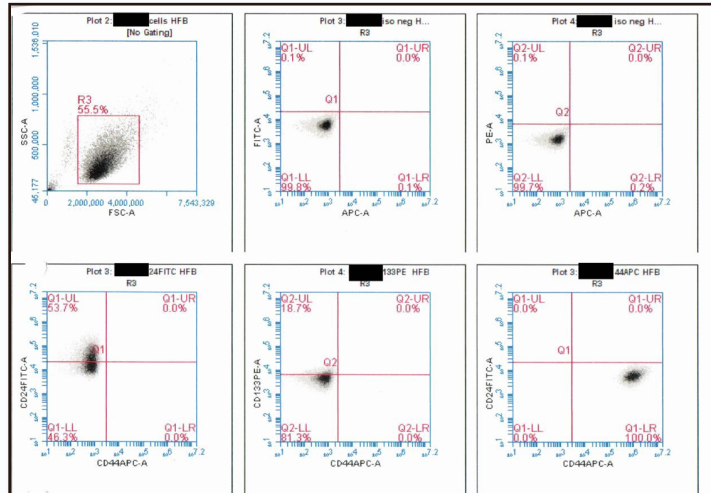

**Supplemental Figure 5. Example of flow cytometric analysis of CD133, CD44, and CD24 expression in a patient-derived primary GBM cell line (Bulk of Tumor - Baseline) and bioreactor-enriched CSCs, related to STAR methods**

- A) Bulk of the Tumor - baseline. CD133 1.4%; CD24 0.3%; CD44 99.1%
- B) Bioreactor-enriched CSCs. CD133 18.7%; CD24 53.7%; CD44 100%

**Supplemental Table 1. List of Chemotherapeutic Agents and Combinations with doses, related to STAR methods**

|          | <b>Single drugs</b>      | <b>Dose</b>                    |
|----------|--------------------------|--------------------------------|
| <b>1</b> | Carboplatin              | 350 mg/m <sup>2</sup> or 4 AUC |
| <b>2</b> | Irinotecan               | 125 mg/m <sup>2</sup>          |
| <b>3</b> | Etoposide                | 50 mg/m <sup>2</sup>           |
| <b>4</b> | BCNU                     | 100 mg/m <sup>2</sup>          |
| <b>5</b> | CCNU                     | 100 mg/m <sup>2</sup>          |
| <b>6</b> | Temozolomide             | 150-200 mg/m <sup>2</sup>      |
| <b>7</b> | Procarbazine             | 60 mg/m <sup>2</sup>           |
| <b>8</b> | Vincristine              | 1.4 mg/m <sup>2</sup>          |
| <b>9</b> | Imatinib                 | 400 mg                         |
|          | <b>Drug combinations</b> | <b>Dose</b>                    |
| <b>1</b> | Procarbazine             | 60 mg/m <sup>2</sup>           |
|          | CCNU                     | 100 mg/m <sup>2</sup>          |
|          | Vincristine              | 1.4 mg/m <sup>2</sup>          |
| <b>2</b> | Carboplatin              | 350 mg/m <sup>2</sup> or 4 AUC |
|          | Irinotecan               | 125 mg/m <sup>2</sup>          |
| <b>3</b> | Carboplatin              | 350 mg/m <sup>2</sup> or 4 AUC |
|          | Etoposide                | 50 mg/m <sup>2</sup>           |
| <b>4</b> | Temozolomide             | 50 mg/m <sup>2</sup>           |
|          | Etoposide                | 50 mg/m <sup>2</sup>           |
| <b>5</b> | Temozolomide             | 50 mg/m <sup>2</sup>           |
|          | Imatinib                 | 200 mg                         |

**Supplemental Table 2. The accordance between the ChemOID assay prediction and treatment administered, related to figure 3**

|                                                         | <b>Physician-choice group</b> | <b>ChemOID-guided group</b> |
|---------------------------------------------------------|-------------------------------|-----------------------------|
| <b>Accordance of assay prediction with regimen used</b> |                               |                             |
| <b>No</b>                                               | 64.5%                         | 19.5%                       |
| <b>Yes</b>                                              | 35.5%                         | 80.5%                       |



**Supplemental Table 3. Treatment-related AE observed, related to figure 3**

| Adverse events                                                              | Physician-choice group |                |                  | ChemolD-guided group |                |                  |
|-----------------------------------------------------------------------------|------------------------|----------------|------------------|----------------------|----------------|------------------|
|                                                                             | AE grades 1-4*         | AE grades 1-2* | AE grades 3 & 4* | AE grades 1-4*       | AE grades 1-2* | AE grades 3 & 4* |
| <b>All, No.</b>                                                             | 92                     | 50             | 42               | 87                   | 44             | 43               |
| <b>Chemotherapy - related, No. (%)</b>                                      | 54/92<br>(59%)         | 25/50<br>(50%) | 33/42<br>(79%)   | 46/87<br>(53%)       | 19/44<br>(43%) | 22/43<br>(51%)   |
| * Grades: 1, mild; 2, moderate; 3, severe; 4, life threatening (CTCAE v5.0) |                        |                |                  |                      |                |                  |

**Supplemental Table 4. Inclusion and exclusion criteria, related to figures 1 and 2**

|                                                                                                                                                                                                                                                                                         |
|-----------------------------------------------------------------------------------------------------------------------------------------------------------------------------------------------------------------------------------------------------------------------------------------|
| <b>Inclusion criteria</b>                                                                                                                                                                                                                                                               |
| Men and Women and members of all ethnic groups who are at least 18 years old at the time of enrollment are eligible for this trial;                                                                                                                                                     |
| Informed consent obtained and signed;                                                                                                                                                                                                                                                   |
| Willing and able to commit to study procedures including long-term follow-up visit(s) on or off the study protocol;                                                                                                                                                                     |
| Histopathologically confirmed 2016-WHO grade III recurrent glioma, and grade IV recurrent glioblastoma (GBM), inclusive of Gliosarcoma;                                                                                                                                                 |
| In all cases, the diagnosis must be confirmed by a pathologist.                                                                                                                                                                                                                         |
| Recurrent surgically resectable tumor and or biopsy;                                                                                                                                                                                                                                    |
| Participants who have undergone surgical resection should have received an MRI or a scan after surgery in order to visualize residual tumor. If not, the operative report must be available;                                                                                            |
| Prior to surgery there was imaging evidence of measurable progressive disease (PD);                                                                                                                                                                                                     |
| Re-radiation, if indicated, should occur at least 2 weeks after surgery and/or biopsy, once the wound has healed well without any drainage or cellulitis;                                                                                                                               |
| Estimated survival of at least 3 months;                                                                                                                                                                                                                                                |
| Hgb > 9 gm; absolute neutrophil count (ANC) > 1500/ $\mu$ l; platelets > 100,000; creatinine < 1.5 times the upper limit of laboratory normal value; bilirubin < 2 times the upper limit of laboratory normal value; SGPT or SGOT < 3 times the upper limit of laboratory normal value; |
| Chemotherapy must start within 8 weeks of tumor resection or biopsy;                                                                                                                                                                                                                    |
| Bevacizumab (Avastin) is allowed. If indicated, it should be initiated at least 4 weeks post craniotomy or biopsy if the wound has healed well without any drainage or cellulitis;                                                                                                      |
| The use of herbal preparation or tetrahydrocannabinol/cannabidiol is strongly discouraged, but not contraindicated;                                                                                                                                                                     |
| <b>Exclusion criteria</b>                                                                                                                                                                                                                                                               |
| Subjects with newly diagnosed GBM                                                                                                                                                                                                                                                       |
| Pregnant women or nursing mothers. Women of childbearing age must have a negative pregnancy test prior to study entry. Women of childbearing potential must practice medically approved contraceptive precautions;                                                                      |
| Abnormal hematological results at inclusion with neutrophils < 1,500/mm <sup>3</sup> and/or blood-platelets < 100,000/mm <sup>3</sup>                                                                                                                                                   |
| Severe or chronic renal insufficiency (creatinine clearance $\leq$ 30 ml/min                                                                                                                                                                                                            |
| Unable to adhere to required procedures, visits, examinations described in the study;                                                                                                                                                                                                   |
| Any usual formal indication against imaging examinations (important claustrophobia, pacemaker);                                                                                                                                                                                         |
| History of another malignancy in the previous 2 years, with a disease-free interval <2 years. Patients with prior history of in situ cancer or basal or squamous cell skin cancer, any time prior to screening, are eligible.                                                           |
| OPTUNE device is not permitted in the study;                                                                                                                                                                                                                                            |
| Participation in clinical trials utilizing a liquid biomarker or imaging studies that impact overall survival.                                                                                                                                                                          |
| Abbreviations: ANC, absolute neutrophil count; GBM, glioblastoma; PD, progressive disease; SGOT, serum glutamate oxaloacetate transaminase; SGPT, serum glutamate pyruvate transaminase.                                                                                                |

**Supplemental Table 5. Examples of Limiting Dilution Tumorigenic Assays of patient-derived GBM of bioreactor-enriched CSCs, related to STAR methods**

Immune-deficient mice were injected into the flank in the presence of matrigel with various doses of GBM bioreactor-enriched CSCs and tumor growth was followed for up to 14 weeks.

| Primary cell line | N° of CSCs Inoculated | N° Tumors formed | Tumor Palpation weeks) |
|-------------------|-----------------------|------------------|------------------------|
| BNC-1             | 1x10 <sup>5</sup>     | 5/5              | 5                      |
|                   | 1x10 <sup>4</sup>     | 5/5              | 8                      |
|                   | 1x10 <sup>3</sup>     | 5/5              | 8-10                   |
|                   | 1x10 <sup>2</sup>     | 4/5              | 8-12                   |
|                   | 1x10 <sup>1</sup>     | 0/5              | 12-14                  |
| BNC-2             | 1x10 <sup>5</sup>     | 5/5              | 5                      |
|                   | 1x10 <sup>4</sup>     | 5/5              | 8                      |
|                   | 1x10 <sup>3</sup>     | 4/5              | 8-10                   |
|                   | 1x10 <sup>2</sup>     | 3/5              | 8-12                   |
|                   | 1x10 <sup>1</sup>     | 0/5              | 12-14                  |
| BNC-3             | 1x10 <sup>5</sup>     | 5/5              | 5                      |
|                   | 1x10 <sup>4</sup>     | 4/5              | 8                      |
|                   | 1x10 <sup>3</sup>     | 4/5              | 8-10                   |
|                   | 1x10 <sup>2</sup>     | 4/5              | 8-12                   |
|                   | 1x10 <sup>1</sup>     | 0/5              | 12-14                  |
| BNC-4             | 1x10 <sup>5</sup>     | 5/5              | 5                      |
|                   | 1x10 <sup>4</sup>     | 5/5              | 8                      |
|                   | 1x10 <sup>3</sup>     | 5/5              | 8-10                   |
|                   | 1x10 <sup>2</sup>     | 4/5              | 8-12                   |
|                   | 1x10 <sup>1</sup>     | 0/5              | 12-14                  |
| BNC-5             | 1x10 <sup>5</sup>     | 5/5              | 5                      |
|                   | 1x10 <sup>4</sup>     | 5/5              | 8                      |
|                   | 1x10 <sup>3</sup>     | 5/5              | 8-10                   |
|                   | 1x10 <sup>2</sup>     | 3/5              | 8-12                   |
|                   | 1x10 <sup>1</sup>     | 0/5              | 12-14                  |
